# Supplementary material for: Dinosaur bonebed amber from an original swamp forest soil
Source: eLife. 2021 Nov 30;10:e72477. doi: 10.7554/eLife.72477 (PMC8631943; doi:10.7554/eLife.72477)
Supplement: Figure 3—source data 1. [file elife-72477-fig3-data1.csv]

Creado como nuevo conjunto de datos
cm-1	%T
4000,00	97,78
3999,00	97,78
3998,00	97,78
3997,00	97,77
3996,00	97,77
3995,00	97,77
3994,00	97,77
3993,00	97,77
3992,00	97,77
3991,00	97,77
3990,00	97,78
3989,00	97,77
3988,00	97,77
3987,00	97,77
3986,00	97,77
3985,00	97,77
3984,00	97,78
3983,00	97,78
3982,00	97,78
3981,00	97,78
3980,00	97,79
3979,00	97,79
3978,00	97,79
3977,00	97,79
3976,00	97,79
3975,00	97,79
3974,00	97,79
3973,00	97,78
3972,00	97,79
3971,00	97,79
3970,00	97,79
3969,00	97,79
3968,00	97,79
3967,00	97,79
3966,00	97,79
3965,00	97,79
3964,00	97,78
3963,00	97,78
3962,00	97,78
3961,00	97,78
3960,00	97,78
3959,00	97,78
3958,00	97,78
3957,00	97,78
3956,00	97,78
3955,00	97,79
3954,00	97,80
3953,00	97,81
3952,00	97,82
3951,00	97,82
3950,00	97,82
3949,00	97,81
3948,00	97,80
3947,00	97,80
3946,00	97,80
3945,00	97,79
3944,00	97,79
3943,00	97,79
3942,00	97,80
3941,00	97,80
3940,00	97,80
3939,00	97,79
3938,00	97,79
3937,00	97,80
3936,00	97,81
3935,00	97,81
3934,00	97,82
3933,00	97,82
3932,00	97,82
3931,00	97,82
3930,00	97,82
3929,00	97,82
3928,00	97,82
3927,00	97,81
3926,00	97,81
3925,00	97,81
3924,00	97,81
3923,00	97,81
3922,00	97,81
3921,00	97,81
3920,00	97,81
3919,00	97,81
3918,00	97,80
3917,00	97,80
3916,00	97,79
3915,00	97,79
3914,00	97,79
3913,00	97,78
3912,00	97,77
3911,00	97,78
3910,00	97,79
3909,00	97,81
3908,00	97,83
3907,00	97,86
3906,00	97,87
3905,00	97,88
3904,00	97,89
3903,00	97,89
3902,00	97,87
3901,00	97,84
3900,00	97,82
3899,00	97,81
3898,00	97,82
3897,00	97,82
3896,00	97,82
3895,00	97,83
3894,00	97,82
3893,00	97,81
3892,00	97,81
3891,00	97,83
3890,00	97,86
3889,00	97,86
3888,00	97,83
3887,00	97,81
3886,00	97,82
3885,00	97,85
3884,00	97,87
3883,00	97,85
3882,00	97,81
3881,00	97,79
3880,00	97,82
3879,00	97,85
3878,00	97,86
3877,00	97,85
3876,00	97,83
3875,00	97,84
3874,00	97,88
3873,00	97,90
3872,00	97,89
3871,00	97,87
3870,00	97,88
3869,00	97,91
3868,00	97,91
3867,00	97,88
3866,00	97,85
3865,00	97,84
3864,00	97,85
3863,00	97,85
3862,00	97,84
3861,00	97,84
3860,00	97,85
3859,00	97,87
3858,00	97,90
3857,00	97,95
3856,00	97,98
3855,00	97,96
3854,00	97,91
3853,00	97,90
3852,00	97,92
3851,00	97,89
3850,00	97,83
3849,00	97,80
3848,00	97,81
3847,00	97,82
3846,00	97,83
3845,00	97,85
3844,00	97,88
3843,00	97,91
3842,00	97,93
3841,00	97,93
3840,00	97,91
3839,00	97,89
3838,00	97,88
3837,00	97,88
3836,00	97,89
3835,00	97,88
3834,00	97,87
3833,00	97,85
3832,00	97,85
3831,00	97,85
3830,00	97,86
3829,00	97,85
3828,00	97,83
3827,00	97,84
3826,00	97,87
3825,00	97,90
3824,00	97,91
3823,00	97,89
3822,00	97,87
3821,00	97,90
3820,00	97,94
3819,00	97,93
3818,00	97,88
3817,00	97,82
3816,00	97,81
3815,00	97,82
3814,00	97,82
3813,00	97,80
3812,00	97,80
3811,00	97,82
3810,00	97,84
3809,00	97,85
3808,00	97,85
3807,00	97,87
3806,00	97,92
3805,00	97,94
3804,00	97,92
3803,00	97,89
3802,00	97,87
3801,00	97,90
3800,00	97,92
3799,00	97,90
3798,00	97,86
3797,00	97,84
3796,00	97,84
3795,00	97,84
3794,00	97,83
3793,00	97,80
3792,00	97,79
3791,00	97,78
3790,00	97,79
3789,00	97,80
3788,00	97,81
3787,00	97,81
3786,00	97,82
3785,00	97,82
3784,00	97,84
3783,00	97,85
3782,00	97,85
3781,00	97,84
3780,00	97,83
3779,00	97,83
3778,00	97,83
3777,00	97,83
3776,00	97,82
3775,00	97,83
3774,00	97,85
3773,00	97,86
3772,00	97,86
3771,00	97,86
3770,00	97,86
3769,00	97,87
3768,00	97,87
3767,00	97,85
3766,00	97,84
3765,00	97,85
3764,00	97,87
3763,00	97,87
3762,00	97,86
3761,00	97,86
3760,00	97,86
3759,00	97,87
3758,00	97,88
3757,00	97,90
3756,00	97,92
3755,00	97,94
3754,00	97,96
3753,00	97,97
3752,00	97,95
3751,00	97,94
3750,00	97,95
3749,00	97,99
3748,00	98,00
3747,00	97,97
3746,00	97,92
3745,00	97,88
3744,00	97,91
3743,00	97,95
3742,00	97,94
3741,00	97,91
3740,00	97,92
3739,00	97,95
3738,00	97,98
3737,00	97,99
3736,00	97,99
3735,00	97,99
3734,00	97,97
3733,00	97,94
3732,00	97,92
3731,00	97,90
3730,00	97,89
3729,00	97,86
3728,00	97,84
3727,00	97,85
3726,00	97,86
3725,00	97,87
3724,00	97,87
3723,00	97,87
3722,00	97,87
3721,00	97,87
3720,00	97,87
3719,00	97,87
3718,00	97,87
3717,00	97,89
3716,00	97,92
3715,00	97,94
3714,00	97,95
3713,00	97,94
3712,00	97,93
3711,00	97,91
3710,00	97,89
3709,00	97,87
3708,00	97,85
3707,00	97,84
3706,00	97,84
3705,00	97,85
3704,00	97,85
3703,00	97,84
3702,00	97,84
3701,00	97,84
3700,00	97,85
3699,00	97,84
3698,00	97,84
3697,00	97,84
3696,00	97,86
3695,00	97,88
3694,00	97,90
3693,00	97,92
3692,00	97,95
3691,00	97,95
3690,00	97,92
3689,00	97,90
3688,00	97,89
3687,00	97,88
3686,00	97,85
3685,00	97,82
3684,00	97,82
3683,00	97,83
3682,00	97,84
3681,00	97,86
3680,00	97,90
3679,00	97,94
3678,00	97,95
3677,00	97,92
3676,00	97,90
3675,00	97,93
3674,00	97,97
3673,00	97,96
3672,00	97,91
3671,00	97,88
3670,00	97,86
3669,00	97,87
3668,00	97,86
3667,00	97,83
3666,00	97,81
3665,00	97,81
3664,00	97,81
3663,00	97,81
3662,00	97,81
3661,00	97,82
3660,00	97,84
3659,00	97,85
3658,00	97,85
3657,00	97,84
3656,00	97,86
3655,00	97,89
3654,00	97,91
3653,00	97,92
3652,00	97,94
3651,00	97,94
3650,00	97,92
3649,00	97,90
3648,00	97,89
3647,00	97,88
3646,00	97,86
3645,00	97,83
3644,00	97,80
3643,00	97,78
3642,00	97,78
3641,00	97,78
3640,00	97,77
3639,00	97,76
3638,00	97,76
3637,00	97,76
3636,00	97,76
3635,00	97,76
3634,00	97,79
3633,00	97,83
3632,00	97,86
3631,00	97,86
3630,00	97,83
3629,00	97,80
3628,00	97,81
3627,00	97,80
3626,00	97,76
3625,00	97,74
3624,00	97,75
3623,00	97,77
3622,00	97,79
3621,00	97,79
3620,00	97,79
3619,00	97,79
3618,00	97,81
3617,00	97,82
3616,00	97,82
3615,00	97,81
3614,00	97,80
3613,00	97,80
3612,00	97,79
3611,00	97,78
3610,00	97,77
3609,00	97,75
3608,00	97,75
3607,00	97,74
3606,00	97,73
3605,00	97,72
3604,00	97,72
3603,00	97,72
3602,00	97,72
3601,00	97,73
3600,00	97,74
3599,00	97,75
3598,00	97,75
3597,00	97,75
3596,00	97,74
3595,00	97,73
3594,00	97,73
3593,00	97,74
3592,00	97,74
3591,00	97,75
3590,00	97,75
3589,00	97,74
3588,00	97,72
3587,00	97,72
3586,00	97,72
3585,00	97,70
3584,00	97,68
3583,00	97,66
3582,00	97,65
3581,00	97,65
3580,00	97,65
3579,00	97,65
3578,00	97,65
3577,00	97,65
3576,00	97,64
3575,00	97,64
3574,00	97,64
3573,00	97,65
3572,00	97,66
3571,00	97,69
3570,00	97,71
3569,00	97,71
3568,00	97,68
3567,00	97,66
3566,00	97,64
3565,00	97,64
3564,00	97,63
3563,00	97,62
3562,00	97,61
3561,00	97,61
3560,00	97,60
3559,00	97,59
3558,00	97,58
3557,00	97,58
3556,00	97,58
3555,00	97,58
3554,00	97,57
3553,00	97,57
3552,00	97,57
3551,00	97,57
3550,00	97,58
3549,00	97,58
3548,00	97,57
3547,00	97,56
3546,00	97,55
3545,00	97,55
3544,00	97,55
3543,00	97,54
3542,00	97,54
3541,00	97,53
3540,00	97,52
3539,00	97,52
3538,00	97,51
3537,00	97,51
3536,00	97,51
3535,00	97,51
3534,00	97,51
3533,00	97,50
3532,00	97,50
3531,00	97,50
3530,00	97,50
3529,00	97,49
3528,00	97,49
3527,00	97,49
3526,00	97,49
3525,00	97,48
3524,00	97,46
3523,00	97,45
3522,00	97,45
3521,00	97,45
3520,00	97,45
3519,00	97,45
3518,00	97,46
3517,00	97,46
3516,00	97,46
3515,00	97,46
3514,00	97,46
3513,00	97,46
3512,00	97,46
3511,00	97,45
3510,00	97,45
3509,00	97,45
3508,00	97,45
3507,00	97,45
3506,00	97,45
3505,00	97,46
3504,00	97,46
3503,00	97,46
3502,00	97,46
3501,00	97,46
3500,00	97,45
3499,00	97,45
3498,00	97,45
3497,00	97,44
3496,00	97,44
3495,00	97,44
3494,00	97,44
3493,00	97,43
3492,00	97,43
3491,00	97,43
3490,00	97,42
3489,00	97,42
3488,00	97,42
3487,00	97,42
3486,00	97,42
3485,00	97,41
3484,00	97,41
3483,00	97,41
3482,00	97,41
3481,00	97,42
3480,00	97,42
3479,00	97,42
3478,00	97,42
3477,00	97,41
3476,00	97,41
3475,00	97,42
3474,00	97,42
3473,00	97,43
3472,00	97,43
3471,00	97,42
3470,00	97,42
3469,00	97,41
3468,00	97,41
3467,00	97,41
3466,00	97,41
3465,00	97,41
3464,00	97,42
3463,00	97,42
3462,00	97,42
3461,00	97,41
3460,00	97,41
3459,00	97,40
3458,00	97,39
3457,00	97,38
3456,00	97,38
3455,00	97,39
3454,00	97,39
3453,00	97,39
3452,00	97,39
3451,00	97,39
3450,00	97,39
3449,00	97,39
3448,00	97,39
3447,00	97,39
3446,00	97,39
3445,00	97,39
3444,00	97,39
3443,00	97,38
3442,00	97,38
3441,00	97,38
3440,00	97,38
3439,00	97,38
3438,00	97,38
3437,00	97,38
3436,00	97,38
3435,00	97,38
3434,00	97,38
3433,00	97,38
3432,00	97,37
3431,00	97,37
3430,00	97,37
3429,00	97,37
3428,00	97,36
3427,00	97,36
3426,00	97,36
3425,00	97,37
3424,00	97,38
3423,00	97,38
3422,00	97,38
3421,00	97,37
3420,00	97,36
3419,00	97,36
3418,00	97,36
3417,00	97,36
3416,00	97,37
3415,00	97,37
3414,00	97,38
3413,00	97,38
3412,00	97,38
3411,00	97,38
3410,00	97,38
3409,00	97,37
3408,00	97,37
3407,00	97,36
3406,00	97,36
3405,00	97,36
3404,00	97,37
3403,00	97,38
3402,00	97,39
3401,00	97,39
3400,00	97,39
3399,00	97,38
3398,00	97,38
3397,00	97,38
3396,00	97,39
3395,00	97,39
3394,00	97,39
3393,00	97,38
3392,00	97,38
3391,00	97,37
3390,00	97,37
3389,00	97,37
3388,00	97,37
3387,00	97,38
3386,00	97,38
3385,00	97,38
3384,00	97,38
3383,00	97,38
3382,00	97,38
3381,00	97,38
3380,00	97,38
3379,00	97,39
3378,00	97,39
3377,00	97,39
3376,00	97,39
3375,00	97,38
3374,00	97,38
3373,00	97,38
3372,00	97,39
3371,00	97,39
3370,00	97,40
3369,00	97,40
3368,00	97,40
3367,00	97,39
3366,00	97,39
3365,00	97,39
3364,00	97,40
3363,00	97,40
3362,00	97,41
3361,00	97,41
3360,00	97,40
3359,00	97,40
3358,00	97,39
3357,00	97,39
3356,00	97,39
3355,00	97,39
3354,00	97,40
3353,00	97,40
3352,00	97,39
3351,00	97,39
3350,00	97,39
3349,00	97,38
3348,00	97,38
3347,00	97,38
3346,00	97,38
3345,00	97,39
3344,00	97,40
3343,00	97,41
3342,00	97,42
3341,00	97,42
3340,00	97,42
3339,00	97,42
3338,00	97,41
3337,00	97,41
3336,00	97,40
3335,00	97,40
3334,00	97,40
3333,00	97,40
3332,00	97,41
3331,00	97,41
3330,00	97,42
3329,00	97,42
3328,00	97,42
3327,00	97,41
3326,00	97,41
3325,00	97,41
3324,00	97,42
3323,00	97,42
3322,00	97,42
3321,00	97,41
3320,00	97,41
3319,00	97,40
3318,00	97,40
3317,00	97,41
3316,00	97,42
3315,00	97,42
3314,00	97,43
3313,00	97,43
3312,00	97,43
3311,00	97,44
3310,00	97,44
3309,00	97,44
3308,00	97,43
3307,00	97,43
3306,00	97,43
3305,00	97,43
3304,00	97,43
3303,00	97,43
3302,00	97,43
3301,00	97,43
3300,00	97,43
3299,00	97,43
3298,00	97,43
3297,00	97,43
3296,00	97,44
3295,00	97,44
3294,00	97,45
3293,00	97,45
3292,00	97,45
3291,00	97,46
3290,00	97,46
3289,00	97,46
3288,00	97,45
3287,00	97,44
3286,00	97,42
3285,00	97,41
3284,00	97,41
3283,00	97,42
3282,00	97,42
3281,00	97,43
3280,00	97,43
3279,00	97,43
3278,00	97,44
3277,00	97,45
3276,00	97,46
3275,00	97,46
3274,00	97,46
3273,00	97,47
3272,00	97,46
3271,00	97,46
3270,00	97,45
3269,00	97,45
3268,00	97,45
3267,00	97,45
3266,00	97,45
3265,00	97,45
3264,00	97,45
3263,00	97,45
3262,00	97,46
3261,00	97,46
3260,00	97,46
3259,00	97,47
3258,00	97,46
3257,00	97,46
3256,00	97,45
3255,00	97,45
3254,00	97,45
3253,00	97,45
3252,00	97,45
3251,00	97,45
3250,00	97,46
3249,00	97,47
3248,00	97,47
3247,00	97,47
3246,00	97,46
3245,00	97,46
3244,00	97,46
3243,00	97,46
3242,00	97,46
3241,00	97,46
3240,00	97,46
3239,00	97,46
3238,00	97,46
3237,00	97,46
3236,00	97,47
3235,00	97,47
3234,00	97,47
3233,00	97,47
3232,00	97,47
3231,00	97,47
3230,00	97,46
3229,00	97,46
3228,00	97,47
3227,00	97,46
3226,00	97,46
3225,00	97,46
3224,00	97,47
3223,00	97,47
3222,00	97,48
3221,00	97,48
3220,00	97,47
3219,00	97,47
3218,00	97,46
3217,00	97,46
3216,00	97,46
3215,00	97,47
3214,00	97,47
3213,00	97,47
3212,00	97,48
3211,00	97,48
3210,00	97,48
3209,00	97,48
3208,00	97,48
3207,00	97,48
3206,00	97,48
3205,00	97,48
3204,00	97,48
3203,00	97,48
3202,00	97,48
3201,00	97,48
3200,00	97,49
3199,00	97,49
3198,00	97,50
3197,00	97,50
3196,00	97,50
3195,00	97,50
3194,00	97,49
3193,00	97,48
3192,00	97,48
3191,00	97,47
3190,00	97,47
3189,00	97,47
3188,00	97,47
3187,00	97,48
3186,00	97,49
3185,00	97,50
3184,00	97,51
3183,00	97,51
3182,00	97,51
3181,00	97,51
3180,00	97,50
3179,00	97,50
3178,00	97,50
3177,00	97,50
3176,00	97,50
3175,00	97,51
3174,00	97,51
3173,00	97,51
3172,00	97,51
3171,00	97,51
3170,00	97,51
3169,00	97,51
3168,00	97,50
3167,00	97,50
3166,00	97,50
3165,00	97,50
3164,00	97,51
3163,00	97,51
3162,00	97,51
3161,00	97,51
3160,00	97,51
3159,00	97,52
3158,00	97,52
3157,00	97,53
3156,00	97,54
3155,00	97,54
3154,00	97,54
3153,00	97,53
3152,00	97,53
3151,00	97,53
3150,00	97,53
3149,00	97,54
3148,00	97,54
3147,00	97,55
3146,00	97,55
3145,00	97,55
3144,00	97,54
3143,00	97,54
3142,00	97,54
3141,00	97,54
3140,00	97,55
3139,00	97,55
3138,00	97,55
3137,00	97,55
3136,00	97,55
3135,00	97,55
3134,00	97,55
3133,00	97,55
3132,00	97,56
3131,00	97,56
3130,00	97,56
3129,00	97,57
3128,00	97,57
3127,00	97,57
3126,00	97,57
3125,00	97,57
3124,00	97,57
3123,00	97,57
3122,00	97,57
3121,00	97,58
3120,00	97,59
3119,00	97,59
3118,00	97,60
3117,00	97,60
3116,00	97,60
3115,00	97,60
3114,00	97,59
3113,00	97,59
3112,00	97,59
3111,00	97,59
3110,00	97,59
3109,00	97,59
3108,00	97,59
3107,00	97,59
3106,00	97,59
3105,00	97,59
3104,00	97,59
3103,00	97,60
3102,00	97,60
3101,00	97,61
3100,00	97,61
3099,00	97,61
3098,00	97,61
3097,00	97,61
3096,00	97,61
3095,00	97,60
3094,00	97,60
3093,00	97,60
3092,00	97,60
3091,00	97,61
3090,00	97,61
3089,00	97,62
3088,00	97,63
3087,00	97,63
3086,00	97,63
3085,00	97,63
3084,00	97,63
3083,00	97,63
3082,00	97,63
3081,00	97,63
3080,00	97,63
3079,00	97,63
3078,00	97,63
3077,00	97,63
3076,00	97,63
3075,00	97,63
3074,00	97,63
3073,00	97,62
3072,00	97,61
3071,00	97,61
3070,00	97,62
3069,00	97,62
3068,00	97,63
3067,00	97,63
3066,00	97,63
3065,00	97,63
3064,00	97,62
3063,00	97,62
3062,00	97,61
3061,00	97,61
3060,00	97,62
3059,00	97,63
3058,00	97,63
3057,00	97,64
3056,00	97,64
3055,00	97,64
3054,00	97,64
3053,00	97,65
3052,00	97,65
3051,00	97,65
3050,00	97,65
3049,00	97,64
3048,00	97,64
3047,00	97,64
3046,00	97,65
3045,00	97,65
3044,00	97,65
3043,00	97,65
3042,00	97,65
3041,00	97,65
3040,00	97,65
3039,00	97,65
3038,00	97,64
3037,00	97,64
3036,00	97,64
3035,00	97,64
3034,00	97,63
3033,00	97,63
3032,00	97,63
3031,00	97,63
3030,00	97,63
3029,00	97,62
3028,00	97,62
3027,00	97,62
3026,00	97,61
3025,00	97,60
3024,00	97,60
3023,00	97,59
3022,00	97,59
3021,00	97,59
3020,00	97,59
3019,00	97,58
3018,00	97,58
3017,00	97,58
3016,00	97,57
3015,00	97,56
3014,00	97,54
3013,00	97,52
3012,00	97,50
3011,00	97,48
3010,00	97,47
3009,00	97,46
3008,00	97,44
3007,00	97,42
3006,00	97,39
3005,00	97,37
3004,00	97,34
3003,00	97,31
3002,00	97,28
3001,00	97,26
3000,00	97,23
2999,00	97,20
2998,00	97,18
2997,00	97,15
2996,00	97,12
2995,00	97,09
2994,00	97,05
2993,00	97,01
2992,00	96,97
2991,00	96,92
2990,00	96,88
2989,00	96,83
2988,00	96,78
2987,00	96,73
2986,00	96,69
2985,00	96,64
2984,00	96,59
2983,00	96,53
2982,00	96,48
2981,00	96,42
2980,00	96,35
2979,00	96,28
2978,00	96,21
2977,00	96,13
2976,00	96,06
2975,00	95,98
2974,00	95,91
2973,00	95,82
2972,00	95,74
2971,00	95,66
2970,00	95,58
2969,00	95,50
2968,00	95,42
2967,00	95,34
2966,00	95,27
2965,00	95,20
2964,00	95,14
2963,00	95,07
2962,00	95,01
2961,00	94,95
2960,00	94,90
2959,00	94,85
2958,00	94,80
2957,00	94,74
2956,00	94,69
2955,00	94,64
2954,00	94,59
2953,00	94,52
2952,00	94,46
2951,00	94,40
2950,00	94,34
2949,00	94,28
2948,00	94,22
2947,00	94,16
2946,00	94,09
2945,00	94,03
2944,00	93,96
2943,00	93,90
2942,00	93,84
2941,00	93,78
2940,00	93,72
2939,00	93,66
2938,00	93,59
2937,00	93,52
2936,00	93,46
2935,00	93,40
2934,00	93,34
2933,00	93,29
2932,00	93,23
2931,00	93,18
2930,00	93,12
2929,00	93,07
2928,00	93,02
2927,00	92,98
2926,00	92,94
2925,00	92,91
2924,00	92,88
2923,00	92,86
2922,00	92,85
2921,00	92,84
2920,00	92,85
2919,00	92,86
2918,00	92,88
2917,00	92,91
2916,00	92,94
2915,00	92,97
2914,00	93,01
2913,00	93,04
2912,00	93,07
2911,00	93,11
2910,00	93,14
2909,00	93,18
2908,00	93,22
2907,00	93,26
2906,00	93,30
2905,00	93,34
2904,00	93,38
2903,00	93,42
2902,00	93,46
2901,00	93,50
2900,00	93,55
2899,00	93,59
2898,00	93,63
2897,00	93,68
2896,00	93,72
2895,00	93,76
2894,00	93,80
2893,00	93,84
2892,00	93,87
2891,00	93,90
2890,00	93,93
2889,00	93,96
2888,00	93,99
2887,00	94,02
2886,00	94,05
2885,00	94,08
2884,00	94,10
2883,00	94,12
2882,00	94,13
2881,00	94,14
2880,00	94,13
2879,00	94,12
2878,00	94,10
2877,00	94,08
2876,00	94,05
2875,00	94,01
2874,00	93,97
2873,00	93,93
2872,00	93,89
2871,00	93,85
2870,00	93,81
2869,00	93,78
2868,00	93,76
2867,00	93,74
2866,00	93,73
2865,00	93,73
2864,00	93,74
2863,00	93,76
2862,00	93,78
2861,00	93,81
2860,00	93,83
2859,00	93,84
2858,00	93,86
2857,00	93,87
2856,00	93,88
2855,00	93,88
2854,00	93,88
2853,00	93,87
2852,00	93,87
2851,00	93,86
2850,00	93,86
2849,00	93,85
2848,00	93,86
2847,00	93,87
2846,00	93,89
2845,00	93,92
2844,00	93,96
2843,00	94,02
2842,00	94,08
2841,00	94,16
2840,00	94,24
2839,00	94,33
2838,00	94,41
2837,00	94,49
2836,00	94,57
2835,00	94,65
2834,00	94,72
2833,00	94,79
2832,00	94,85
2831,00	94,91
2830,00	94,96
2829,00	95,01
2828,00	95,06
2827,00	95,12
2826,00	95,18
2825,00	95,24
2824,00	95,31
2823,00	95,38
2822,00	95,44
2821,00	95,50
2820,00	95,57
2819,00	95,64
2818,00	95,70
2817,00	95,77
2816,00	95,83
2815,00	95,88
2814,00	95,93
2813,00	95,97
2812,00	96,02
2811,00	96,06
2810,00	96,09
2809,00	96,13
2808,00	96,16
2807,00	96,19
2806,00	96,21
2805,00	96,24
2804,00	96,27
2803,00	96,29
2802,00	96,31
2801,00	96,33
2800,00	96,35
2799,00	96,37
2798,00	96,39
2797,00	96,41
2796,00	96,43
2795,00	96,45
2794,00	96,46
2793,00	96,47
2792,00	96,49
2791,00	96,50
2790,00	96,52
2789,00	96,53
2788,00	96,54
2787,00	96,54
2786,00	96,55
2785,00	96,56
2784,00	96,57
2783,00	96,58
2782,00	96,59
2781,00	96,60
2780,00	96,61
2779,00	96,62
2778,00	96,63
2777,00	96,64
2776,00	96,64
2775,00	96,65
2774,00	96,66
2773,00	96,67
2772,00	96,68
2771,00	96,69
2770,00	96,70
2769,00	96,70
2768,00	96,71
2767,00	96,72
2766,00	96,72
2765,00	96,73
2764,00	96,74
2763,00	96,75
2762,00	96,75
2761,00	96,76
2760,00	96,76
2759,00	96,76
2758,00	96,76
2757,00	96,76
2756,00	96,77
2755,00	96,77
2754,00	96,78
2753,00	96,79
2752,00	96,79
2751,00	96,80
2750,00	96,80
2749,00	96,80
2748,00	96,80
2747,00	96,81
2746,00	96,81
2745,00	96,81
2744,00	96,81
2743,00	96,81
2742,00	96,82
2741,00	96,82
2740,00	96,82
2739,00	96,82
2738,00	96,82
2737,00	96,82
2736,00	96,83
2735,00	96,83
2734,00	96,83
2733,00	96,83
2732,00	96,83
2731,00	96,84
2730,00	96,84
2729,00	96,85
2728,00	96,85
2727,00	96,85
2726,00	96,84
2725,00	96,84
2724,00	96,84
2723,00	96,84
2722,00	96,84
2721,00	96,85
2720,00	96,85
2719,00	96,85
2718,00	96,85
2717,00	96,85
2716,00	96,85
2715,00	96,86
2714,00	96,86
2713,00	96,86
2712,00	96,86
2711,00	96,87
2710,00	96,87
2709,00	96,87
2708,00	96,88
2707,00	96,88
2706,00	96,89
2705,00	96,89
2704,00	96,89
2703,00	96,89
2702,00	96,89
2701,00	96,89
2700,00	96,89
2699,00	96,89
2698,00	96,90
2697,00	96,90
2696,00	96,90
2695,00	96,91
2694,00	96,91
2693,00	96,91
2692,00	96,91
2691,00	96,91
2690,00	96,91
2689,00	96,91
2688,00	96,91
2687,00	96,91
2686,00	96,91
2685,00	96,90
2684,00	96,90
2683,00	96,90
2682,00	96,90
2681,00	96,91
2680,00	96,91
2679,00	96,91
2678,00	96,90
2677,00	96,91
2676,00	96,91
2675,00	96,91
2674,00	96,91
2673,00	96,91
2672,00	96,91
2671,00	96,91
2670,00	96,91
2669,00	96,92
2668,00	96,92
2667,00	96,92
2666,00	96,92
2665,00	96,91
2664,00	96,90
2663,00	96,90
2662,00	96,90
2661,00	96,91
2660,00	96,91
2659,00	96,92
2658,00	96,92
2657,00	96,91
2656,00	96,91
2655,00	96,91
2654,00	96,91
2653,00	96,92
2652,00	96,92
2651,00	96,92
2650,00	96,92
2649,00	96,93
2648,00	96,93
2647,00	96,94
2646,00	96,95
2645,00	96,95
2644,00	96,96
2643,00	96,97
2642,00	96,97
2641,00	96,97
2640,00	96,97
2639,00	96,97
2638,00	96,97
2637,00	96,96
2636,00	96,97
2635,00	96,97
2634,00	96,98
2633,00	96,98
2632,00	96,99
2631,00	96,99
2630,00	96,99
2629,00	96,99
2628,00	97,00
2627,00	97,01
2626,00	97,01
2625,00	97,02
2624,00	97,02
2623,00	97,03
2622,00	97,03
2621,00	97,03
2620,00	97,02
2619,00	97,02
2618,00	97,02
2617,00	97,03
2616,00	97,03
2615,00	97,04
2614,00	97,04
2613,00	97,05
2612,00	97,05
2611,00	97,06
2610,00	97,07
2609,00	97,08
2608,00	97,09
2607,00	97,10
2606,00	97,09
2605,00	97,08
2604,00	97,06
2603,00	97,06
2602,00	97,07
2601,00	97,08
2600,00	97,09
2599,00	97,10
2598,00	97,10
2597,00	97,10
2596,00	97,10
2595,00	97,11
2594,00	97,11
2593,00	97,12
2592,00	97,11
2591,00	97,11
2590,00	97,10
2589,00	97,10
2588,00	97,10
2587,00	97,10
2586,00	97,11
2585,00	97,11
2584,00	97,11
2583,00	97,12
2582,00	97,12
2581,00	97,12
2580,00	97,12
2579,00	97,12
2578,00	97,12
2577,00	97,12
2576,00	97,13
2575,00	97,13
2574,00	97,13
2573,00	97,12
2572,00	97,12
2571,00	97,13
2570,00	97,13
2569,00	97,12
2568,00	97,12
2567,00	97,13
2566,00	97,15
2565,00	97,15
2564,00	97,15
2563,00	97,15
2562,00	97,15
2561,00	97,15
2560,00	97,15
2559,00	97,15
2558,00	97,15
2557,00	97,16
2556,00	97,16
2555,00	97,16
2554,00	97,16
2553,00	97,16
2552,00	97,15
2551,00	97,15
2550,00	97,14
2549,00	97,14
2548,00	97,14
2547,00	97,16
2546,00	97,17
2545,00	97,17
2544,00	97,17
2543,00	97,15
2542,00	97,15
2541,00	97,15
2540,00	97,17
2539,00	97,19
2538,00	97,19
2537,00	97,20
2536,00	97,19
2535,00	97,20
2534,00	97,20
2533,00	97,19
2532,00	97,18
2531,00	97,18
2530,00	97,18
2529,00	97,18
2528,00	97,18
2527,00	97,18
2526,00	97,17
2525,00	97,16
2524,00	97,16
2523,00	97,17
2522,00	97,17
2521,00	97,17
2520,00	97,17
2519,00	97,18
2518,00	97,19
2517,00	97,20
2516,00	97,21
2515,00	97,22
2514,00	97,22
2513,00	97,22
2512,00	97,22
2511,00	97,22
2510,00	97,22
2509,00	97,22
2508,00	97,22
2507,00	97,21
2506,00	97,22
2505,00	97,23
2504,00	97,24
2503,00	97,25
2502,00	97,25
2501,00	97,24
2500,00	97,24
2499,00	97,23
2498,00	97,23
2497,00	97,22
2496,00	97,21
2495,00	97,22
2494,00	97,24
2493,00	97,25
2492,00	97,24
2491,00	97,23
2490,00	97,22
2489,00	97,21
2488,00	97,22
2487,00	97,22
2486,00	97,23
2485,00	97,23
2484,00	97,23
2483,00	97,23
2482,00	97,23
2481,00	97,22
2480,00	97,22
2479,00	97,21
2478,00	97,21
2477,00	97,22
2476,00	97,22
2475,00	97,23
2474,00	97,24
2473,00	97,24
2472,00	97,24
2471,00	97,24
2470,00	97,24
2469,00	97,24
2468,00	97,24
2467,00	97,25
2466,00	97,26
2465,00	97,27
2464,00	97,27
2463,00	97,26
2462,00	97,24
2461,00	97,22
2460,00	97,21
2459,00	97,20
2458,00	97,21
2457,00	97,22
2456,00	97,22
2455,00	97,23
2454,00	97,25
2453,00	97,26
2452,00	97,27
2451,00	97,27
2450,00	97,27
2449,00	97,27
2448,00	97,27
2447,00	97,27
2446,00	97,27
2445,00	97,28
2444,00	97,29
2443,00	97,30
2442,00	97,30
2441,00	97,30
2440,00	97,28
2439,00	97,27
2438,00	97,26
2437,00	97,26
2436,00	97,26
2435,00	97,27
2434,00	97,28
2433,00	97,29
2432,00	97,29
2431,00	97,28
2430,00	97,27
2429,00	97,26
2428,00	97,26
2427,00	97,26
2426,00	97,27
2425,00	97,28
2424,00	97,28
2423,00	97,28
2422,00	97,28
2421,00	97,29
2420,00	97,29
2419,00	97,30
2418,00	97,30
2417,00	97,29
2416,00	97,29
2415,00	97,28
2414,00	97,28
2413,00	97,28
2412,00	97,29
2411,00	97,29
2410,00	97,29
2409,00	97,28
2408,00	97,29
2407,00	97,30
2406,00	97,31
2405,00	97,32
2404,00	97,32
2403,00	97,33
2402,00	97,33
2401,00	97,33
2400,00	97,32
2399,00	97,31
2398,00	97,30
2397,00	97,29
2396,00	97,30
2395,00	97,30
2394,00	97,31
2393,00	97,31
2392,00	97,31
2391,00	97,33
2390,00	97,34
2389,00	97,35
2388,00	97,35
2387,00	97,35
2386,00	97,35
2385,00	97,34
2384,00	97,34
2383,00	97,33
2382,00	97,33
2381,00	97,34
2380,00	97,36
2379,00	97,38
2378,00	97,39
2377,00	97,40
2376,00	97,41
2375,00	97,42
2374,00	97,44
2373,00	97,45
2372,00	97,45
2371,00	97,44
2370,00	97,42
2369,00	97,40
2368,00	97,40
2367,00	97,40
2366,00	97,40
2365,00	97,40
2364,00	97,41
2363,00	97,41
2362,00	97,40
2361,00	97,40
2360,00	97,40
2359,00	97,39
2358,00	97,39
2357,00	97,39
2356,00	97,39
2355,00	97,40
2354,00	97,41
2353,00	97,41
2352,00	97,41
2351,00	97,41
2350,00	97,41
2349,00	97,40
2348,00	97,40
2347,00	97,39
2346,00	97,39
2345,00	97,39
2344,00	97,39
2343,00	97,39
2342,00	97,38
2341,00	97,38
2340,00	97,38
2339,00	97,39
2338,00	97,39
2337,00	97,39
2336,00	97,38
2335,00	97,37
2334,00	97,37
2333,00	97,37
2332,00	97,38
2331,00	97,39
2330,00	97,40
2329,00	97,39
2328,00	97,37
2327,00	97,33
2326,00	97,30
2325,00	97,27
2324,00	97,26
2323,00	97,27
2322,00	97,30
2321,00	97,32
2320,00	97,33
2319,00	97,34
2318,00	97,34
2317,00	97,33
2316,00	97,32
2315,00	97,32
2314,00	97,31
2313,00	97,31
2312,00	97,31
2311,00	97,33
2310,00	97,34
2309,00	97,35
2308,00	97,34
2307,00	97,33
2306,00	97,31
2305,00	97,30
2304,00	97,29
2303,00	97,29
2302,00	97,30
2301,00	97,30
2300,00	97,30
2299,00	97,30
2298,00	97,30
2297,00	97,30
2296,00	97,29
2295,00	97,29
2294,00	97,28
2293,00	97,27
2292,00	97,26
2291,00	97,25
2290,00	97,23
2289,00	97,22
2288,00	97,21
2287,00	97,20
2286,00	97,20
2285,00	97,20
2284,00	97,20
2283,00	97,22
2282,00	97,23
2281,00	97,24
2280,00	97,25
2279,00	97,27
2278,00	97,29
2277,00	97,30
2276,00	97,30
2275,00	97,29
2274,00	97,28
2273,00	97,28
2272,00	97,29
2271,00	97,31
2270,00	97,32
2269,00	97,33
2268,00	97,34
2267,00	97,35
2266,00	97,37
2265,00	97,37
2264,00	97,36
2263,00	97,32
2262,00	97,28
2261,00	97,24
2260,00	97,21
2259,00	97,21
2258,00	97,22
2257,00	97,24
2256,00	97,27
2255,00	97,29
2254,00	97,31
2253,00	97,33
2252,00	97,35
2251,00	97,38
2250,00	97,40
2249,00	97,40
2248,00	97,37
2247,00	97,33
2246,00	97,29
2245,00	97,27
2244,00	97,26
2243,00	97,24
2242,00	97,23
2241,00	97,24
2240,00	97,28
2239,00	97,33
2238,00	97,37
2237,00	97,39
2236,00	97,38
2235,00	97,35
2234,00	97,31
2233,00	97,29
2232,00	97,30
2231,00	97,34
2230,00	97,38
2229,00	97,40
2228,00	97,41
2227,00	97,40
2226,00	97,39
2225,00	97,37
2224,00	97,36
2223,00	97,38
2222,00	97,40
2221,00	97,43
2220,00	97,43
2219,00	97,42
2218,00	97,40
2217,00	97,38
2216,00	97,35
2215,00	97,32
2214,00	97,30
2213,00	97,31
2212,00	97,34
2211,00	97,39
2210,00	97,44
2209,00	97,44
2208,00	97,43
2207,00	97,41
2206,00	97,39
2205,00	97,38
2204,00	97,37
2203,00	97,34
2202,00	97,30
2201,00	97,27
2200,00	97,26
2199,00	97,27
2198,00	97,26
2197,00	97,23
2196,00	97,20
2195,00	97,20
2194,00	97,21
2193,00	97,24
2192,00	97,26
2191,00	97,29
2190,00	97,31
2189,00	97,33
2188,00	97,34
2187,00	97,33
2186,00	97,33
2185,00	97,33
2184,00	97,33
2183,00	97,35
2182,00	97,37
2181,00	97,38
2180,00	97,35
2179,00	97,30
2178,00	97,26
2177,00	97,26
2176,00	97,30
2175,00	97,34
2174,00	97,37
2173,00	97,38
2172,00	97,39
2171,00	97,39
2170,00	97,36
2169,00	97,32
2168,00	97,32
2167,00	97,38
2166,00	97,44
2165,00	97,42
2164,00	97,33
2163,00	97,23
2162,00	97,18
2161,00	97,22
2160,00	97,35
2159,00	97,49
2158,00	97,57
2157,00	97,58
2156,00	97,55
2155,00	97,51
2154,00	97,48
2153,00	97,47
2152,00	97,51
2151,00	97,59
2150,00	97,66
2149,00	97,68
2148,00	97,63
2147,00	97,55
2146,00	97,47
2145,00	97,42
2144,00	97,42
2143,00	97,47
2142,00	97,52
2141,00	97,56
2140,00	97,56
2139,00	97,56
2138,00	97,56
2137,00	97,58
2136,00	97,60
2135,00	97,61
2134,00	97,60
2133,00	97,57
2132,00	97,56
2131,00	97,56
2130,00	97,57
2129,00	97,58
2128,00	97,58
2127,00	97,58
2126,00	97,58
2125,00	97,57
2124,00	97,54
2123,00	97,51
2122,00	97,49
2121,00	97,47
2120,00	97,45
2119,00	97,44
2118,00	97,42
2117,00	97,40
2116,00	97,39
2115,00	97,38
2114,00	97,38
2113,00	97,37
2112,00	97,38
2111,00	97,37
2110,00	97,37
2109,00	97,37
2108,00	97,39
2107,00	97,41
2106,00	97,41
2105,00	97,39
2104,00	97,37
2103,00	97,38
2102,00	97,40
2101,00	97,41
2100,00	97,41
2099,00	97,40
2098,00	97,39
2097,00	97,40
2096,00	97,42
2095,00	97,44
2094,00	97,45
2093,00	97,44
2092,00	97,43
2091,00	97,42
2090,00	97,41
2089,00	97,40
2088,00	97,39
2087,00	97,39
2086,00	97,39
2085,00	97,39
2084,00	97,39
2083,00	97,38
2082,00	97,38
2081,00	97,37
2080,00	97,38
2079,00	97,39
2078,00	97,39
2077,00	97,39
2076,00	97,38
2075,00	97,37
2074,00	97,37
2073,00	97,37
2072,00	97,38
2071,00	97,39
2070,00	97,39
2069,00	97,38
2068,00	97,38
2067,00	97,38
2066,00	97,40
2065,00	97,43
2064,00	97,44
2063,00	97,43
2062,00	97,39
2061,00	97,35
2060,00	97,32
2059,00	97,33
2058,00	97,36
2057,00	97,37
2056,00	97,39
2055,00	97,39
2054,00	97,40
2053,00	97,39
2052,00	97,38
2051,00	97,40
2050,00	97,42
2049,00	97,43
2048,00	97,44
2047,00	97,47
2046,00	97,52
2045,00	97,57
2044,00	97,60
2043,00	97,58
2042,00	97,51
2041,00	97,46
2040,00	97,47
2039,00	97,54
2038,00	97,62
2037,00	97,65
2036,00	97,64
2035,00	97,60
2034,00	97,58
2033,00	97,55
2032,00	97,53
2031,00	97,56
2030,00	97,63
2029,00	97,70
2028,00	97,72
2027,00	97,67
2026,00	97,61
2025,00	97,56
2024,00	97,50
2023,00	97,41
2022,00	97,32
2021,00	97,29
2020,00	97,34
2019,00	97,46
2018,00	97,55
2017,00	97,58
2016,00	97,56
2015,00	97,51
2014,00	97,46
2013,00	97,45
2012,00	97,48
2011,00	97,52
2010,00	97,56
2009,00	97,58
2008,00	97,62
2007,00	97,65
2006,00	97,62
2005,00	97,54
2004,00	97,45
2003,00	97,42
[truncated: 1,783 more rows]
