# Supplementary material for: Dinosaur bonebed amber from an original swamp forest soil
Source: eLife. 2021 Nov 30;10:e72477. doi: 10.7554/eLife.72477 (PMC8631943; doi:10.7554/eLife.72477)
Supplement: Figure 3—source data 2. [file elife-72477-fig3-data2.csv]

Creado como nuevo conjunto de datos
cm-1	%T
4000,00	97,06
3999,00	97,06
3998,00	97,05
3997,00	97,05
3996,00	97,05
3995,00	97,05
3994,00	97,05
3993,00	97,05
3992,00	97,05
3991,00	97,05
3990,00	97,05
3989,00	97,05
3988,00	97,04
3987,00	97,03
3986,00	97,03
3985,00	97,03
3984,00	97,03
3983,00	97,03
3982,00	97,03
3981,00	97,04
3980,00	97,04
3979,00	97,04
3978,00	97,05
3977,00	97,05
3976,00	97,04
3975,00	97,04
3974,00	97,04
3973,00	97,04
3972,00	97,04
3971,00	97,04
3970,00	97,05
3969,00	97,05
3968,00	97,05
3967,00	97,05
3966,00	97,05
3965,00	97,04
3964,00	97,03
3963,00	97,03
3962,00	97,03
3961,00	97,03
3960,00	97,04
3959,00	97,05
3958,00	97,05
3957,00	97,05
3956,00	97,05
3955,00	97,05
3954,00	97,05
3953,00	97,05
3952,00	97,05
3951,00	97,04
3950,00	97,04
3949,00	97,03
3948,00	97,04
3947,00	97,04
3946,00	97,04
3945,00	97,04
3944,00	97,05
3943,00	97,05
3942,00	97,05
3941,00	97,05
3940,00	97,05
3939,00	97,05
3938,00	97,05
3937,00	97,05
3936,00	97,04
3935,00	97,04
3934,00	97,04
3933,00	97,04
3932,00	97,04
3931,00	97,05
3930,00	97,06
3929,00	97,06
3928,00	97,07
3927,00	97,06
3926,00	97,06
3925,00	97,06
3924,00	97,06
3923,00	97,06
3922,00	97,06
3921,00	97,06
3920,00	97,06
3919,00	97,06
3918,00	97,06
3917,00	97,07
3916,00	97,07
3915,00	97,06
3914,00	97,05
3913,00	97,04
3912,00	97,03
3911,00	97,03
3910,00	97,03
3909,00	97,03
3908,00	97,04
3907,00	97,04
3906,00	97,04
3905,00	97,04
3904,00	97,04
3903,00	97,04
3902,00	97,04
3901,00	97,03
3900,00	97,04
3899,00	97,04
3898,00	97,05
3897,00	97,06
3896,00	97,06
3895,00	97,07
3894,00	97,06
3893,00	97,06
3892,00	97,05
3891,00	97,05
3890,00	97,05
3889,00	97,05
3888,00	97,06
3887,00	97,06
3886,00	97,06
3885,00	97,06
3884,00	97,05
3883,00	97,04
3882,00	97,03
3881,00	97,04
3880,00	97,05
3879,00	97,06
3878,00	97,06
3877,00	97,05
3876,00	97,05
3875,00	97,05
3874,00	97,05
3873,00	97,04
3872,00	97,04
3871,00	97,04
3870,00	97,05
3869,00	97,06
3868,00	97,05
3867,00	97,05
3866,00	97,04
3865,00	97,05
3864,00	97,05
3863,00	97,06
3862,00	97,06
3861,00	97,05
3860,00	97,05
3859,00	97,04
3858,00	97,04
3857,00	97,06
3856,00	97,07
3855,00	97,08
3854,00	97,07
3853,00	97,06
3852,00	97,05
3851,00	97,03
3850,00	97,02
3849,00	97,02
3848,00	97,02
3847,00	97,03
3846,00	97,04
3845,00	97,04
3844,00	97,05
3843,00	97,05
3842,00	97,05
3841,00	97,04
3840,00	97,04
3839,00	97,03
3838,00	97,03
3837,00	97,03
3836,00	97,03
3835,00	97,03
3834,00	97,04
3833,00	97,04
3832,00	97,03
3831,00	97,03
3830,00	97,02
3829,00	97,02
3828,00	97,02
3827,00	97,03
3826,00	97,04
3825,00	97,04
3824,00	97,05
3823,00	97,05
3822,00	97,05
3821,00	97,05
3820,00	97,05
3819,00	97,04
3818,00	97,03
3817,00	97,03
3816,00	97,03
3815,00	97,03
3814,00	97,02
3813,00	97,02
3812,00	97,02
3811,00	97,03
3810,00	97,03
3809,00	97,03
3808,00	97,03
3807,00	97,04
3806,00	97,05
3805,00	97,06
3804,00	97,06
3803,00	97,06
3802,00	97,06
3801,00	97,06
3800,00	97,05
3799,00	97,04
3798,00	97,03
3797,00	97,03
3796,00	97,04
3795,00	97,04
3794,00	97,05
3793,00	97,06
3792,00	97,06
3791,00	97,06
3790,00	97,06
3789,00	97,05
3788,00	97,05
3787,00	97,05
3786,00	97,05
3785,00	97,04
3784,00	97,04
3783,00	97,04
3782,00	97,04
3781,00	97,04
3780,00	97,05
3779,00	97,06
3778,00	97,06
3777,00	97,06
3776,00	97,06
3775,00	97,06
3774,00	97,07
3773,00	97,08
3772,00	97,08
3771,00	97,08
3770,00	97,08
3769,00	97,09
3768,00	97,09
3767,00	97,09
3766,00	97,08
3765,00	97,08
3764,00	97,07
3763,00	97,07
3762,00	97,07
3761,00	97,08
3760,00	97,08
3759,00	97,08
3758,00	97,08
3757,00	97,08
3756,00	97,09
3755,00	97,09
3754,00	97,09
3753,00	97,09
3752,00	97,07
3751,00	97,07
3750,00	97,07
3749,00	97,08
3748,00	97,08
3747,00	97,09
3746,00	97,10
3745,00	97,09
3744,00	97,09
3743,00	97,08
3742,00	97,07
3741,00	97,07
3740,00	97,08
3739,00	97,09
3738,00	97,09
3737,00	97,08
3736,00	97,09
3735,00	97,10
3734,00	97,12
3733,00	97,12
3732,00	97,11
3731,00	97,09
3730,00	97,08
3729,00	97,07
3728,00	97,07
3727,00	97,07
3726,00	97,07
3725,00	97,07
3724,00	97,07
3723,00	97,08
3722,00	97,08
3721,00	97,09
3720,00	97,08
3719,00	97,08
3718,00	97,08
3717,00	97,08
3716,00	97,09
3715,00	97,10
3714,00	97,10
3713,00	97,09
3712,00	97,08
3711,00	97,08
3710,00	97,07
3709,00	97,07
3708,00	97,07
3707,00	97,07
3706,00	97,06
3705,00	97,06
3704,00	97,06
3703,00	97,05
3702,00	97,06
3701,00	97,06
3700,00	97,07
3699,00	97,07
3698,00	97,07
3697,00	97,07
3696,00	97,07
3695,00	97,07
3694,00	97,07
3693,00	97,07
3692,00	97,08
3691,00	97,09
3690,00	97,09
3689,00	97,09
3688,00	97,08
3687,00	97,07
3686,00	97,05
3685,00	97,04
3684,00	97,04
3683,00	97,04
3682,00	97,04
3681,00	97,04
3680,00	97,04
3679,00	97,05
3678,00	97,06
3677,00	97,08
3676,00	97,09
3675,00	97,11
3674,00	97,12
3673,00	97,11
3672,00	97,10
3671,00	97,09
3670,00	97,07
3669,00	97,06
3668,00	97,05
3667,00	97,04
3666,00	97,04
3665,00	97,04
3664,00	97,04
3663,00	97,05
3662,00	97,06
3661,00	97,06
3660,00	97,07
3659,00	97,07
3658,00	97,06
3657,00	97,06
3656,00	97,06
3655,00	97,05
3654,00	97,05
3653,00	97,04
3652,00	97,03
3651,00	97,02
3650,00	97,02
3649,00	97,03
3648,00	97,05
3647,00	97,06
3646,00	97,05
3645,00	97,04
3644,00	97,04
3643,00	97,03
3642,00	97,03
3641,00	97,03
3640,00	97,02
3639,00	97,01
3638,00	96,99
3637,00	96,98
3636,00	96,98
3635,00	96,98
3634,00	96,98
3633,00	96,99
3632,00	96,98
3631,00	96,96
3630,00	96,95
3629,00	96,94
3628,00	96,95
3627,00	96,96
3626,00	96,96
3625,00	96,97
3624,00	96,97
3623,00	96,98
3622,00	96,98
3621,00	96,99
3620,00	96,98
3619,00	96,98
3618,00	96,97
3617,00	96,96
3616,00	96,96
3615,00	96,96
3614,00	96,97
3613,00	96,98
3612,00	96,97
3611,00	96,96
3610,00	96,94
3609,00	96,93
3608,00	96,92
3607,00	96,92
3606,00	96,93
3605,00	96,93
3604,00	96,93
3603,00	96,94
3602,00	96,94
3601,00	96,94
3600,00	96,94
3599,00	96,94
3598,00	96,95
3597,00	96,95
3596,00	96,94
3595,00	96,94
3594,00	96,94
3593,00	96,94
3592,00	96,93
3591,00	96,92
3590,00	96,90
3589,00	96,89
3588,00	96,89
3587,00	96,90
3586,00	96,91
3585,00	96,92
3584,00	96,91
3583,00	96,90
3582,00	96,88
3581,00	96,87
3580,00	96,86
3579,00	96,86
3578,00	96,86
3577,00	96,86
3576,00	96,85
3575,00	96,85
3574,00	96,85
3573,00	96,85
3572,00	96,85
3571,00	96,85
3570,00	96,84
3569,00	96,83
3568,00	96,83
3567,00	96,84
3566,00	96,85
3565,00	96,85
3564,00	96,84
3563,00	96,82
3562,00	96,80
3561,00	96,79
3560,00	96,79
3559,00	96,79
3558,00	96,79
3557,00	96,79
3556,00	96,78
3555,00	96,77
3554,00	96,77
3553,00	96,76
3552,00	96,76
3551,00	96,76
3550,00	96,76
3549,00	96,76
3548,00	96,75
3547,00	96,75
3546,00	96,75
3545,00	96,75
3544,00	96,75
3543,00	96,74
3542,00	96,73
3541,00	96,73
3540,00	96,73
3539,00	96,73
3538,00	96,73
3537,00	96,72
3536,00	96,72
3535,00	96,71
3534,00	96,70
3533,00	96,69
3532,00	96,68
3531,00	96,68
3530,00	96,67
3529,00	96,67
3528,00	96,67
3527,00	96,67
3526,00	96,67
3525,00	96,67
3524,00	96,66
3523,00	96,66
3522,00	96,66
3521,00	96,66
3520,00	96,65
3519,00	96,65
3518,00	96,64
3517,00	96,64
3516,00	96,63
3515,00	96,63
3514,00	96,62
3513,00	96,62
3512,00	96,61
3511,00	96,61
3510,00	96,62
3509,00	96,62
3508,00	96,62
3507,00	96,63
3506,00	96,63
3505,00	96,63
3504,00	96,62
3503,00	96,61
3502,00	96,61
3501,00	96,60
3500,00	96,60
3499,00	96,59
3498,00	96,58
3497,00	96,57
3496,00	96,57
3495,00	96,57
3494,00	96,57
3493,00	96,57
3492,00	96,58
3491,00	96,58
3490,00	96,57
3489,00	96,57
3488,00	96,57
3487,00	96,56
3486,00	96,56
3485,00	96,56
3484,00	96,56
3483,00	96,56
3482,00	96,56
3481,00	96,56
3480,00	96,56
3479,00	96,56
3478,00	96,56
3477,00	96,55
3476,00	96,55
3475,00	96,55
3474,00	96,55
3473,00	96,55
3472,00	96,55
3471,00	96,56
3470,00	96,56
3469,00	96,56
3468,00	96,56
3467,00	96,56
3466,00	96,55
3465,00	96,55
3464,00	96,54
3463,00	96,54
3462,00	96,53
3461,00	96,53
3460,00	96,53
3459,00	96,53
3458,00	96,52
3457,00	96,52
3456,00	96,52
3455,00	96,52
3454,00	96,52
3453,00	96,53
3452,00	96,53
3451,00	96,53
3450,00	96,53
3449,00	96,53
3448,00	96,52
3447,00	96,52
3446,00	96,53
3445,00	96,52
3444,00	96,52
3443,00	96,52
3442,00	96,52
3441,00	96,52
3440,00	96,52
3439,00	96,53
3438,00	96,53
3437,00	96,53
3436,00	96,53
3435,00	96,53
3434,00	96,53
3433,00	96,52
3432,00	96,52
3431,00	96,51
3430,00	96,51
3429,00	96,51
3428,00	96,51
3427,00	96,51
3426,00	96,51
3425,00	96,50
3424,00	96,49
3423,00	96,49
3422,00	96,48
3421,00	96,48
3420,00	96,48
3419,00	96,49
3418,00	96,50
3417,00	96,51
3416,00	96,51
3415,00	96,51
3414,00	96,50
3413,00	96,50
3412,00	96,49
3411,00	96,49
3410,00	96,49
3409,00	96,49
3408,00	96,49
3407,00	96,49
3406,00	96,50
3405,00	96,50
3404,00	96,51
3403,00	96,51
3402,00	96,51
3401,00	96,51
3400,00	96,50
3399,00	96,50
3398,00	96,49
3397,00	96,49
3396,00	96,50
3395,00	96,50
3394,00	96,50
3393,00	96,50
3392,00	96,50
3391,00	96,49
3390,00	96,49
3389,00	96,49
3388,00	96,49
3387,00	96,49
3386,00	96,49
3385,00	96,49
3384,00	96,49
3383,00	96,49
3382,00	96,49
3381,00	96,50
3380,00	96,50
3379,00	96,50
3378,00	96,50
3377,00	96,50
3376,00	96,50
3375,00	96,51
3374,00	96,51
3373,00	96,51
3372,00	96,52
3371,00	96,52
3370,00	96,52
3369,00	96,52
3368,00	96,51
3367,00	96,51
3366,00	96,51
3365,00	96,51
3364,00	96,52
3363,00	96,52
3362,00	96,52
3361,00	96,53
3360,00	96,53
3359,00	96,54
3358,00	96,54
3357,00	96,54
3356,00	96,53
3355,00	96,53
3354,00	96,53
3353,00	96,53
3352,00	96,53
3351,00	96,53
3350,00	96,52
3349,00	96,53
3348,00	96,53
3347,00	96,53
3346,00	96,54
3345,00	96,54
3344,00	96,54
3343,00	96,54
3342,00	96,55
3341,00	96,55
3340,00	96,55
3339,00	96,55
3338,00	96,55
3337,00	96,54
3336,00	96,54
3335,00	96,54
3334,00	96,54
3333,00	96,54
3332,00	96,55
3331,00	96,55
3330,00	96,55
3329,00	96,55
3328,00	96,56
3327,00	96,56
3326,00	96,55
3325,00	96,55
3324,00	96,55
3323,00	96,55
3322,00	96,55
3321,00	96,55
3320,00	96,55
3319,00	96,55
3318,00	96,55
3317,00	96,56
3316,00	96,55
3315,00	96,55
3314,00	96,55
3313,00	96,55
3312,00	96,56
3311,00	96,56
3310,00	96,57
3309,00	96,58
3308,00	96,58
3307,00	96,57
3306,00	96,56
3305,00	96,56
3304,00	96,56
3303,00	96,56
3302,00	96,56
3301,00	96,56
3300,00	96,56
3299,00	96,56
3298,00	96,57
3297,00	96,58
3296,00	96,58
3295,00	96,59
3294,00	96,59
3293,00	96,59
3292,00	96,59
3291,00	96,59
3290,00	96,59
3289,00	96,59
3288,00	96,59
3287,00	96,59
3286,00	96,58
3285,00	96,58
3284,00	96,58
3283,00	96,58
3282,00	96,58
3281,00	96,58
3280,00	96,59
3279,00	96,59
3278,00	96,60
3277,00	96,60
3276,00	96,61
3275,00	96,61
3274,00	96,62
3273,00	96,62
3272,00	96,61
3271,00	96,61
3270,00	96,61
3269,00	96,61
3268,00	96,61
3267,00	96,61
3266,00	96,61
3265,00	96,62
3264,00	96,62
3263,00	96,62
3262,00	96,62
3261,00	96,62
3260,00	96,61
3259,00	96,61
3258,00	96,60
3257,00	96,60
3256,00	96,60
3255,00	96,61
3254,00	96,61
3253,00	96,61
3252,00	96,62
3251,00	96,62
3250,00	96,62
3249,00	96,62
3248,00	96,62
3247,00	96,62
3246,00	96,62
3245,00	96,62
3244,00	96,62
3243,00	96,63
3242,00	96,63
3241,00	96,63
3240,00	96,62
3239,00	96,62
3238,00	96,62
3237,00	96,62
3236,00	96,62
3235,00	96,62
3234,00	96,63
3233,00	96,64
3232,00	96,65
3231,00	96,65
3230,00	96,65
3229,00	96,64
3228,00	96,64
3227,00	96,63
3226,00	96,63
3225,00	96,63
3224,00	96,64
3223,00	96,64
3222,00	96,65
3221,00	96,64
3220,00	96,64
3219,00	96,64
3218,00	96,64
3217,00	96,64
3216,00	96,64
3215,00	96,64
3214,00	96,64
3213,00	96,64
3212,00	96,64
3211,00	96,64
3210,00	96,64
3209,00	96,65
3208,00	96,65
3207,00	96,65
3206,00	96,65
3205,00	96,65
3204,00	96,65
3203,00	96,65
3202,00	96,65
3201,00	96,65
3200,00	96,65
3199,00	96,65
3198,00	96,66
3197,00	96,67
3196,00	96,67
3195,00	96,68
3194,00	96,68
3193,00	96,67
3192,00	96,67
3191,00	96,67
3190,00	96,67
3189,00	96,67
3188,00	96,67
3187,00	96,67
3186,00	96,68
3185,00	96,68
3184,00	96,69
3183,00	96,69
3182,00	96,69
3181,00	96,69
3180,00	96,69
3179,00	96,69
3178,00	96,69
3177,00	96,68
3176,00	96,68
3175,00	96,68
3174,00	96,69
3173,00	96,69
3172,00	96,69
3171,00	96,70
3170,00	96,70
3169,00	96,70
3168,00	96,70
3167,00	96,70
3166,00	96,70
3165,00	96,70
3164,00	96,70
3163,00	96,70
3162,00	96,71
3161,00	96,71
3160,00	96,72
3159,00	96,72
3158,00	96,72
3157,00	96,71
3156,00	96,71
3155,00	96,71
3154,00	96,71
3153,00	96,71
3152,00	96,71
3151,00	96,71
3150,00	96,72
3149,00	96,72
3148,00	96,72
3147,00	96,73
3146,00	96,73
3145,00	96,74
3144,00	96,74
3143,00	96,74
3142,00	96,74
3141,00	96,74
3140,00	96,74
3139,00	96,74
3138,00	96,74
3137,00	96,75
3136,00	96,75
3135,00	96,75
3134,00	96,75
3133,00	96,75
3132,00	96,75
3131,00	96,75
3130,00	96,75
3129,00	96,75
3128,00	96,75
3127,00	96,75
3126,00	96,76
3125,00	96,76
3124,00	96,76
3123,00	96,77
3122,00	96,77
3121,00	96,78
3120,00	96,78
3119,00	96,78
3118,00	96,78
3117,00	96,78
3116,00	96,78
3115,00	96,78
3114,00	96,78
3113,00	96,78
3112,00	96,78
3111,00	96,79
3110,00	96,79
3109,00	96,79
3108,00	96,79
3107,00	96,79
3106,00	96,80
3105,00	96,80
3104,00	96,80
3103,00	96,80
3102,00	96,80
3101,00	96,80
3100,00	96,80
3099,00	96,80
3098,00	96,80
3097,00	96,80
3096,00	96,79
3095,00	96,80
3094,00	96,80
3093,00	96,81
3092,00	96,82
3091,00	96,82
3090,00	96,82
3089,00	96,82
3088,00	96,82
3087,00	96,82
3086,00	96,82
3085,00	96,82
3084,00	96,82
3083,00	96,83
3082,00	96,84
3081,00	96,85
3080,00	96,85
3079,00	96,85
3078,00	96,85
3077,00	96,84
3076,00	96,84
3075,00	96,84
3074,00	96,85
3073,00	96,85
3072,00	96,84
3071,00	96,84
3070,00	96,84
3069,00	96,84
3068,00	96,84
3067,00	96,84
3066,00	96,85
3065,00	96,85
3064,00	96,85
3063,00	96,85
3062,00	96,85
3061,00	96,85
3060,00	96,85
3059,00	96,86
3058,00	96,86
3057,00	96,87
3056,00	96,87
3055,00	96,88
3054,00	96,88
3053,00	96,88
3052,00	96,89
3051,00	96,89
3050,00	96,89
3049,00	96,90
3048,00	96,89
3047,00	96,89
3046,00	96,89
3045,00	96,88
3044,00	96,88
3043,00	96,89
3042,00	96,89
3041,00	96,90
3040,00	96,90
3039,00	96,90
3038,00	96,90
3037,00	96,90
3036,00	96,90
3035,00	96,90
3034,00	96,90
3033,00	96,90
3032,00	96,91
3031,00	96,91
3030,00	96,91
3029,00	96,91
3028,00	96,91
3027,00	96,91
3026,00	96,91
3025,00	96,91
3024,00	96,91
3023,00	96,90
3022,00	96,90
3021,00	96,90
3020,00	96,89
3019,00	96,89
3018,00	96,88
3017,00	96,87
3016,00	96,87
3015,00	96,86
3014,00	96,85
3013,00	96,84
3012,00	96,83
3011,00	96,82
3010,00	96,81
3009,00	96,79
3008,00	96,78
3007,00	96,76
3006,00	96,74
3005,00	96,72
3004,00	96,70
3003,00	96,68
3002,00	96,65
3001,00	96,63
3000,00	96,60
2999,00	96,57
2998,00	96,54
2997,00	96,51
2996,00	96,48
2995,00	96,46
2994,00	96,43
2993,00	96,41
2992,00	96,38
2991,00	96,35
2990,00	96,31
2989,00	96,28
2988,00	96,24
2987,00	96,19
2986,00	96,15
2985,00	96,10
2984,00	96,06
2983,00	96,02
2982,00	95,97
2981,00	95,93
2980,00	95,87
2979,00	95,82
2978,00	95,75
2977,00	95,69
2976,00	95,62
2975,00	95,56
2974,00	95,49
2973,00	95,42
2972,00	95,36
2971,00	95,29
2970,00	95,23
2969,00	95,16
2968,00	95,10
2967,00	95,03
2966,00	94,97
2965,00	94,92
2964,00	94,86
2963,00	94,81
2962,00	94,76
2961,00	94,71
2960,00	94,67
2959,00	94,62
2958,00	94,58
2957,00	94,54
2956,00	94,50
2955,00	94,46
2954,00	94,42
2953,00	94,37
2952,00	94,31
2951,00	94,25
2950,00	94,19
2949,00	94,13
2948,00	94,07
2947,00	94,01
2946,00	93,95
2945,00	93,89
2944,00	93,83
2943,00	93,77
2942,00	93,71
2941,00	93,65
2940,00	93,59
2939,00	93,53
2938,00	93,48
2937,00	93,43
2936,00	93,37
2935,00	93,32
2934,00	93,27
2933,00	93,22
2932,00	93,18
2931,00	93,13
2930,00	93,09
2929,00	93,05
2928,00	93,02
2927,00	93,00
2926,00	92,97
2925,00	92,96
2924,00	92,95
2923,00	92,94
2922,00	92,93
2921,00	92,93
2920,00	92,93
2919,00	92,94
2918,00	92,96
2917,00	92,98
2916,00	92,99
2915,00	93,01
2914,00	93,03
2913,00	93,06
2912,00	93,09
2911,00	93,12
2910,00	93,15
2909,00	93,18
2908,00	93,20
2907,00	93,23
2906,00	93,26
2905,00	93,29
2904,00	93,32
2903,00	93,36
2902,00	93,39
2901,00	93,43
2900,00	93,47
2899,00	93,51
2898,00	93,54
2897,00	93,57
2896,00	93,59
2895,00	93,62
2894,00	93,64
2893,00	93,67
2892,00	93,70
2891,00	93,72
2890,00	93,75
2889,00	93,77
2888,00	93,80
2887,00	93,82
2886,00	93,85
2885,00	93,86
2884,00	93,88
2883,00	93,89
2882,00	93,90
2881,00	93,90
2880,00	93,89
2879,00	93,88
2878,00	93,87
2877,00	93,85
2876,00	93,82
2875,00	93,79
2874,00	93,76
2873,00	93,73
2872,00	93,69
2871,00	93,66
2870,00	93,63
2869,00	93,59
2868,00	93,57
2867,00	93,55
2866,00	93,54
2865,00	93,53
2864,00	93,54
2863,00	93,54
2862,00	93,55
2861,00	93,57
2860,00	93,59
2859,00	93,60
2858,00	93,62
2857,00	93,63
2856,00	93,64
2855,00	93,65
2854,00	93,65
2853,00	93,65
2852,00	93,65
2851,00	93,64
2850,00	93,63
2849,00	93,64
2848,00	93,65
2847,00	93,66
2846,00	93,69
2845,00	93,71
2844,00	93,74
2843,00	93,78
2842,00	93,83
2841,00	93,88
2840,00	93,94
2839,00	94,00
2838,00	94,06
2837,00	94,12
2836,00	94,18
2835,00	94,23
2834,00	94,29
2833,00	94,34
2832,00	94,39
2831,00	94,43
2830,00	94,47
2829,00	94,51
2828,00	94,54
2827,00	94,58
2826,00	94,62
2825,00	94,67
2824,00	94,71
2823,00	94,77
2822,00	94,82
2821,00	94,87
2820,00	94,92
2819,00	94,97
2818,00	95,03
2817,00	95,08
2816,00	95,12
2815,00	95,16
2814,00	95,20
2813,00	95,23
2812,00	95,27
2811,00	95,31
2810,00	95,33
2809,00	95,36
2808,00	95,39
2807,00	95,41
2806,00	95,43
2805,00	95,45
2804,00	95,48
2803,00	95,50
2802,00	95,52
2801,00	95,53
2800,00	95,55
2799,00	95,56
2798,00	95,57
2797,00	95,58
2796,00	95,60
2795,00	95,61
2794,00	95,62
2793,00	95,64
2792,00	95,65
2791,00	95,67
2790,00	95,68
2789,00	95,69
2788,00	95,70
2787,00	95,71
2786,00	95,71
2785,00	95,72
2784,00	95,72
2783,00	95,73
2782,00	95,74
2781,00	95,74
2780,00	95,75
2779,00	95,77
2778,00	95,78
2777,00	95,80
2776,00	95,81
2775,00	95,82
2774,00	95,82
2773,00	95,83
2772,00	95,84
2771,00	95,84
2770,00	95,84
2769,00	95,84
2768,00	95,84
2767,00	95,85
2766,00	95,85
2765,00	95,86
2764,00	95,86
2763,00	95,86
2762,00	95,87
2761,00	95,87
2760,00	95,88
2759,00	95,89
2758,00	95,89
2757,00	95,90
2756,00	95,90
2755,00	95,91
2754,00	95,91
2753,00	95,91
2752,00	95,92
2751,00	95,93
2750,00	95,93
2749,00	95,93
2748,00	95,93
2747,00	95,94
2746,00	95,94
2745,00	95,94
2744,00	95,94
2743,00	95,93
2742,00	95,94
2741,00	95,94
2740,00	95,94
2739,00	95,95
2738,00	95,95
2737,00	95,95
2736,00	95,96
2735,00	95,96
2734,00	95,96
2733,00	95,96
2732,00	95,96
2731,00	95,95
2730,00	95,95
2729,00	95,96
2728,00	95,96
2727,00	95,97
2726,00	95,98
2725,00	95,98
2724,00	95,98
2723,00	95,98
2722,00	95,98
2721,00	95,97
2720,00	95,97
2719,00	95,97
2718,00	95,98
2717,00	95,98
2716,00	95,99
2715,00	95,99
2714,00	95,99
2713,00	95,99
2712,00	95,99
2711,00	95,99
2710,00	96,00
2709,00	96,00
2708,00	96,00
2707,00	96,00
2706,00	96,01
2705,00	96,01
2704,00	96,00
2703,00	96,00
2702,00	96,00
2701,00	96,00
2700,00	96,01
2699,00	96,01
2698,00	96,02
2697,00	96,02
2696,00	96,02
2695,00	96,02
2694,00	96,02
2693,00	96,02
2692,00	96,02
2691,00	96,02
2690,00	96,02
2689,00	96,03
2688,00	96,03
2687,00	96,03
2686,00	96,03
2685,00	96,03
2684,00	96,03
2683,00	96,03
2682,00	96,03
2681,00	96,03
2680,00	96,03
2679,00	96,03
2678,00	96,03
2677,00	96,04
2676,00	96,04
2675,00	96,04
2674,00	96,05
2673,00	96,05
2672,00	96,05
2671,00	96,05
2670,00	96,04
2669,00	96,04
2668,00	96,04
2667,00	96,03
2666,00	96,03
2665,00	96,03
2664,00	96,03
2663,00	96,03
2662,00	96,02
2661,00	96,02
2660,00	96,01
2659,00	96,01
2658,00	96,01
2657,00	96,01
2656,00	96,01
2655,00	96,01
2654,00	96,02
2653,00	96,02
2652,00	96,03
2651,00	96,04
2650,00	96,04
2649,00	96,05
2648,00	96,05
2647,00	96,05
2646,00	96,05
2645,00	96,06
2644,00	96,06
2643,00	96,07
2642,00	96,07
2641,00	96,08
2640,00	96,07
2639,00	96,07
2638,00	96,07
2637,00	96,08
2636,00	96,09
2635,00	96,10
2634,00	96,10
2633,00	96,11
2632,00	96,11
2631,00	96,11
2630,00	96,12
2629,00	96,12
2628,00	96,13
2627,00	96,13
2626,00	96,13
2625,00	96,13
2624,00	96,13
2623,00	96,13
2622,00	96,14
2621,00	96,14
2620,00	96,15
2619,00	96,16
2618,00	96,16
2617,00	96,17
2616,00	96,17
2615,00	96,17
2614,00	96,17
2613,00	96,17
2612,00	96,17
2611,00	96,17
2610,00	96,17
2609,00	96,17
2608,00	96,18
2607,00	96,19
2606,00	96,20
2605,00	96,21
2604,00	96,22
2603,00	96,22
2602,00	96,21
2601,00	96,20
2600,00	96,19
2599,00	96,18
2598,00	96,19
2597,00	96,19
2596,00	96,20
2595,00	96,21
2594,00	96,21
2593,00	96,21
2592,00	96,21
2591,00	96,22
2590,00	96,23
2589,00	96,24
2588,00	96,25
2587,00	96,24
2586,00	96,23
2585,00	96,23
2584,00	96,22
2583,00	96,21
2582,00	96,21
2581,00	96,21
2580,00	96,22
2579,00	96,23
2578,00	96,24
2577,00	96,24
2576,00	96,25
2575,00	96,24
2574,00	96,24
2573,00	96,25
2572,00	96,26
2571,00	96,27
2570,00	96,27
2569,00	96,27
2568,00	96,27
2567,00	96,27
2566,00	96,27
2565,00	96,28
2564,00	96,28
2563,00	96,28
2562,00	96,27
2561,00	96,26
2560,00	96,26
2559,00	96,26
2558,00	96,26
2557,00	96,27
2556,00	96,27
2555,00	96,27
2554,00	96,27
2553,00	96,28
2552,00	96,27
2551,00	96,26
2550,00	96,25
2549,00	96,24
2548,00	96,25
2547,00	96,26
2546,00	96,27
2545,00	96,27
2544,00	96,26
2543,00	96,27
2542,00	96,27
2541,00	96,27
2540,00	96,27
2539,00	96,27
2538,00	96,27
2537,00	96,27
2536,00	96,28
2535,00	96,30
2534,00	96,31
2533,00	96,31
2532,00	96,30
2531,00	96,29
2530,00	96,28
2529,00	96,27
2528,00	96,27
2527,00	96,28
2526,00	96,29
2525,00	96,29
2524,00	96,29
2523,00	96,29
2522,00	96,29
2521,00	96,30
2520,00	96,31
2519,00	96,31
2518,00	96,31
2517,00	96,30
2516,00	96,29
2515,00	96,29
2514,00	96,28
2513,00	96,28
2512,00	96,29
2511,00	96,30
2510,00	96,31
2509,00	96,30
2508,00	96,30
2507,00	96,30
2506,00	96,29
2505,00	96,29
2504,00	96,30
2503,00	96,30
2502,00	96,31
2501,00	96,31
2500,00	96,31
2499,00	96,31
2498,00	96,31
2497,00	96,31
2496,00	96,31
2495,00	96,30
2494,00	96,30
2493,00	96,30
2492,00	96,29
2491,00	96,28
2490,00	96,27
2489,00	96,27
2488,00	96,27
2487,00	96,29
2486,00	96,30
2485,00	96,30
2484,00	96,29
2483,00	96,29
2482,00	96,30
2481,00	96,30
2480,00	96,31
2479,00	96,31
2478,00	96,32
2477,00	96,31
2476,00	96,31
2475,00	96,30
2474,00	96,29
2473,00	96,29
2472,00	96,30
2471,00	96,31
2470,00	96,32
2469,00	96,32
2468,00	96,32
2467,00	96,33
2466,00	96,34
2465,00	96,34
2464,00	96,33
2463,00	96,33
2462,00	96,32
2461,00	96,30
2460,00	96,28
2459,00	96,27
2458,00	96,26
2457,00	96,26
2456,00	96,27
2455,00	96,28
2454,00	96,29
2453,00	96,31
2452,00	96,31
2451,00	96,32
2450,00	96,32
2449,00	96,32
2448,00	96,32
2447,00	96,32
2446,00	96,33
2445,00	96,33
2444,00	96,33
2443,00	96,31
2442,00	96,29
2441,00	96,28
2440,00	96,28
2439,00	96,29
2438,00	96,31
2437,00	96,32
2436,00	96,32
2435,00	96,32
2434,00	96,32
2433,00	96,32
2432,00	96,32
2431,00	96,32
2430,00	96,32
2429,00	96,33
2428,00	96,34
2427,00	96,34
2426,00	96,34
2425,00	96,33
2424,00	96,33
2423,00	96,32
2422,00	96,32
2421,00	96,33
2420,00	96,34
2419,00	96,35
2418,00	96,36
2417,00	96,36
2416,00	96,35
2415,00	96,35
2414,00	96,35
2413,00	96,35
2412,00	96,34
2411,00	96,34
2410,00	96,34
2409,00	96,34
2408,00	96,35
2407,00	96,37
2406,00	96,38
2405,00	96,38
2404,00	96,37
2403,00	96,36
2402,00	96,37
2401,00	96,37
2400,00	96,38
2399,00	96,39
2398,00	96,39
2397,00	96,40
2396,00	96,40
2395,00	96,41
2394,00	96,41
2393,00	96,40
2392,00	96,39
2391,00	96,39
2390,00	96,39
2389,00	96,39
2388,00	96,40
2387,00	96,41
2386,00	96,41
2385,00	96,39
2384,00	96,38
2383,00	96,37
2382,00	96,37
2381,00	96,38
2380,00	96,38
2379,00	96,39
2378,00	96,41
2377,00	96,42
2376,00	96,44
2375,00	96,46
2374,00	96,46
2373,00	96,45
2372,00	96,44
2371,00	96,42
2370,00	96,42
2369,00	96,41
2368,00	96,40
2367,00	96,39
2366,00	96,39
2365,00	96,39
2364,00	96,40
2363,00	96,40
2362,00	96,39
2361,00	96,38
2360,00	96,37
2359,00	96,37
2358,00	96,38
2357,00	96,39
2356,00	96,39
2355,00	96,39
2354,00	96,39
2353,00	96,39
2352,00	96,40
2351,00	96,40
2350,00	96,40
2349,00	96,39
2348,00	96,36
2347,00	96,34
2346,00	96,33
2345,00	96,34
2344,00	96,35
2343,00	96,34
2342,00	96,33
2341,00	96,33
2340,00	96,33
2339,00	96,33
2338,00	96,33
2337,00	96,33
2336,00	96,32
2335,00	96,32
2334,00	96,32
2333,00	96,32
2332,00	96,33
2331,00	96,33
2330,00	96,33
2329,00	96,33
2328,00	96,31
2327,00	96,27
2326,00	96,23
2325,00	96,20
2324,00	96,19
2323,00	96,21
2322,00	96,24
2321,00	96,26
2320,00	96,27
2319,00	96,26
2318,00	96,26
2317,00	96,26
2316,00	96,27
2315,00	96,28
2314,00	96,29
2313,00	96,30
2312,00	96,31
2311,00	96,32
2310,00	96,32
2309,00	96,32
2308,00	96,32
2307,00	96,32
2306,00	96,32
2305,00	96,32
2304,00	96,32
2303,00	96,30
2302,00	96,28
2301,00	96,27
2300,00	96,28
2299,00	96,29
2298,00	96,31
2297,00	96,31
2296,00	96,31
2295,00	96,30
2294,00	96,28
2293,00	96,26
2292,00	96,24
2291,00	96,22
2290,00	96,21
2289,00	96,22
2288,00	96,24
2287,00	96,26
2286,00	96,27
2285,00	96,28
2284,00	96,30
2283,00	96,31
2282,00	96,32
2281,00	96,31
2280,00	96,29
2279,00	96,29
2278,00	96,30
2277,00	96,32
2276,00	96,33
2275,00	96,33
2274,00	96,33
2273,00	96,32
2272,00	96,31
2271,00	96,31
2270,00	96,33
2269,00	96,34
2268,00	96,35
2267,00	96,35
2266,00	96,35
2265,00	96,34
2264,00	96,34
2263,00	96,35
2262,00	96,36
2261,00	96,37
2260,00	96,38
2259,00	96,38
2258,00	96,38
2257,00	96,37
2256,00	96,36
2255,00	96,37
2254,00	96,38
2253,00	96,40
2252,00	96,42
2251,00	96,43
2250,00	96,43
2249,00	96,42
2248,00	96,41
2247,00	96,40
2246,00	96,38
2245,00	96,37
2244,00	96,37
2243,00	96,38
2242,00	96,41
2241,00	96,44
2240,00	96,45
2239,00	96,43
2238,00	96,40
2237,00	96,36
2236,00	96,33
2235,00	96,31
2234,00	96,30
2233,00	96,30
2232,00	96,28
2231,00	96,26
2230,00	96,25
2229,00	96,26
2228,00	96,29
2227,00	96,33
2226,00	96,33
2225,00	96,30
2224,00	96,25
2223,00	96,23
2222,00	96,23
2221,00	96,26
2220,00	96,30
2219,00	96,33
2218,00	96,36
2217,00	96,38
2216,00	96,40
2215,00	96,41
2214,00	96,41
2213,00	96,39
2212,00	96,37
2211,00	96,34
2210,00	96,30
2209,00	96,27
2208,00	96,26
2207,00	96,29
2206,00	96,34
2205,00	96,39
2204,00	96,42
2203,00	96,43
2202,00	96,41
2201,00	96,40
2200,00	96,41
2199,00	96,42
2198,00	96,41
2197,00	96,37
2196,00	96,33
2195,00	96,32
2194,00	96,33
2193,00	96,32
2192,00	96,28
2191,00	96,24
2190,00	96,22
2189,00	96,22
2188,00	96,26
2187,00	96,33
2186,00	96,38
2185,00	96,39
2184,00	96,34
2183,00	96,27
2182,00	96,25
2181,00	96,26
2180,00	96,29
2179,00	96,32
2178,00	96,35
2177,00	96,38
2176,00	96,41
2175,00	96,44
2174,00	96,43
2173,00	96,38
2172,00	96,31
2171,00	96,26
2170,00	96,25
2169,00	96,29
2168,00	96,34
2167,00	96,39
2166,00	96,42
2165,00	96,42
2164,00	96,41
2163,00	96,38
2162,00	96,37
2161,00	96,43
2160,00	96,57
2159,00	96,74
2158,00	96,84
2157,00	96,83
2156,00	96,76
2155,00	96,68
2154,00	96,61
2153,00	96,57
2152,00	96,54
2151,00	96,54
2150,00	96,56
2149,00	96,58
2148,00	96,62
2147,00	96,66
2146,00	96,67
2145,00	96,65
2144,00	96,61
2143,00	96,58
2142,00	96,57
2141,00	96,57
2140,00	96,60
2139,00	96,61
2138,00	96,62
2137,00	96,61
2136,00	96,60
2135,00	96,62
2134,00	96,65
2133,00	96,69
2132,00	96,70
2131,00	96,70
2130,00	96,68
2129,00	96,65
2128,00	96,61
2127,00	96,58
2126,00	96,56
2125,00	96,56
2124,00	96,56
2123,00	96,55
2122,00	96,53
2121,00	96,49
2120,00	96,46
2119,00	96,45
2118,00	96,44
2117,00	96,43
2116,00	96,42
2115,00	96,40
2114,00	96,40
2113,00	96,40
2112,00	96,40
2111,00	96,40
2110,00	96,39
2109,00	96,37
2108,00	96,35
2107,00	96,36
2106,00	96,39
2105,00	96,42
2104,00	96,44
2103,00	96,42
2102,00	96,40
2101,00	96,38
2100,00	96,37
2099,00	96,37
2098,00	96,37
2097,00	96,40
2096,00	96,44
2095,00	96,48
2094,00	96,48
2093,00	96,46
2092,00	96,42
2091,00	96,39
2090,00	96,38
2089,00	96,38
2088,00	96,39
2087,00	96,41
2086,00	96,43
2085,00	96,45
2084,00	96,45
2083,00	96,43
2082,00	96,42
2081,00	96,40
2080,00	96,39
2079,00	96,38
2078,00	96,37
2077,00	96,37
2076,00	96,39
2075,00	96,42
2074,00	96,43
2073,00	96,44
2072,00	96,43
2071,00	96,44
2070,00	96,45
2069,00	96,46
2068,00	96,45
2067,00	96,44
2066,00	96,43
2065,00	96,43
2064,00	96,42
2063,00	96,41
2062,00	96,41
2061,00	96,42
2060,00	96,45
2059,00	96,48
2058,00	96,49
2057,00	96,48
2056,00	96,47
2055,00	96,44
2054,00	96,38
2053,00	96,32
2052,00	96,28
2051,00	96,31
2050,00	96,39
2049,00	96,47
2048,00	96,51
2047,00	96,50
2046,00	96,49
2045,00	96,48
2044,00	96,48
2043,00	96,48
2042,00	96,47
2041,00	96,45
2040,00	96,42
2039,00	96,42
2038,00	96,44
2037,00	96,46
2036,00	96,48
2035,00	96,50
2034,00	96,51
2033,00	96,52
2032,00	96,57
2031,00	96,64
2030,00	96,70
2029,00	96,71
2028,00	96,66
2027,00	96,58
2026,00	96,50
2025,00	96,46
2024,00	96,46
2023,00	96,50
2022,00	96,55
2021,00	96,60
2020,00	96,66
2019,00	96,69
2018,00	96,68
2017,00	96,63
2016,00	96,59
2015,00	96,60
2014,00	96,62
2013,00	96,62
2012,00	96,61
2011,00	96,57
2010,00	96,49
2009,00	96,37
2008,00	96,28
2007,00	96,24
2006,00	96,28
2005,00	96,35
2004,00	96,43
2003,00	96,48
[truncated: 1,783 more rows]
