# Supplementary material for: Dinosaur bonebed amber from an original swamp forest soil
Source: eLife. 2021 Nov 30;10:e72477. doi: 10.7554/eLife.72477 (PMC8631943; doi:10.7554/eLife.72477)
Supplement: Figure 3—source data 3. [file elife-72477-fig3-data3.csv]

Creado como nuevo conjunto de datos
cm-1	%T
4000,00	94,72
3999,00	94,72
3998,00	94,72
3997,00	94,72
3996,00	94,71
3995,00	94,71
3994,00	94,71
3993,00	94,70
3992,00	94,70
3991,00	94,70
3990,00	94,70
3989,00	94,71
3988,00	94,71
3987,00	94,72
3986,00	94,72
3985,00	94,72
3984,00	94,73
3983,00	94,73
3982,00	94,72
3981,00	94,72
3980,00	94,72
3979,00	94,72
3978,00	94,72
3977,00	94,73
3976,00	94,73
3975,00	94,72
3974,00	94,72
3973,00	94,72
3972,00	94,71
3971,00	94,71
3970,00	94,71
3969,00	94,71
3968,00	94,71
3967,00	94,72
3966,00	94,72
3965,00	94,72
3964,00	94,72
3963,00	94,72
3962,00	94,72
3961,00	94,72
3960,00	94,72
3959,00	94,73
3958,00	94,73
3957,00	94,73
3956,00	94,73
3955,00	94,73
3954,00	94,73
3953,00	94,74
3952,00	94,74
3951,00	94,74
3950,00	94,74
3949,00	94,74
3948,00	94,73
3947,00	94,72
3946,00	94,72
3945,00	94,71
3944,00	94,71
3943,00	94,71
3942,00	94,71
3941,00	94,71
3940,00	94,71
3939,00	94,71
3938,00	94,71
3937,00	94,72
3936,00	94,72
3935,00	94,72
3934,00	94,72
3933,00	94,72
3932,00	94,73
3931,00	94,73
3930,00	94,74
3929,00	94,74
3928,00	94,73
3927,00	94,72
3926,00	94,72
3925,00	94,71
3924,00	94,71
3923,00	94,71
3922,00	94,71
3921,00	94,71
3920,00	94,71
3919,00	94,71
3918,00	94,70
3917,00	94,70
3916,00	94,69
3915,00	94,69
3914,00	94,70
3913,00	94,70
3912,00	94,70
3911,00	94,71
3910,00	94,72
3909,00	94,72
3908,00	94,72
3907,00	94,72
3906,00	94,72
3905,00	94,71
3904,00	94,71
3903,00	94,70
3902,00	94,69
3901,00	94,69
3900,00	94,70
3899,00	94,71
3898,00	94,72
3897,00	94,72
3896,00	94,72
3895,00	94,71
3894,00	94,72
3893,00	94,72
3892,00	94,73
3891,00	94,73
3890,00	94,73
3889,00	94,73
3888,00	94,73
3887,00	94,73
3886,00	94,73
3885,00	94,73
3884,00	94,73
3883,00	94,73
3882,00	94,74
3881,00	94,74
3880,00	94,74
3879,00	94,73
3878,00	94,72
3877,00	94,72
3876,00	94,73
3875,00	94,73
3874,00	94,73
3873,00	94,73
3872,00	94,74
3871,00	94,75
3870,00	94,75
3869,00	94,74
3868,00	94,73
3867,00	94,74
3866,00	94,75
3865,00	94,76
3864,00	94,75
3863,00	94,74
3862,00	94,74
3861,00	94,73
3860,00	94,74
3859,00	94,74
3858,00	94,74
3857,00	94,74
3856,00	94,74
3855,00	94,73
3854,00	94,74
3853,00	94,75
3852,00	94,75
3851,00	94,75
3850,00	94,75
3849,00	94,76
3848,00	94,76
3847,00	94,77
3846,00	94,77
3845,00	94,77
3844,00	94,77
3843,00	94,76
3842,00	94,76
3841,00	94,77
3840,00	94,78
3839,00	94,78
3838,00	94,78
3837,00	94,78
3836,00	94,78
3835,00	94,79
3834,00	94,80
3833,00	94,80
3832,00	94,79
3831,00	94,78
3830,00	94,77
3829,00	94,77
3828,00	94,77
3827,00	94,77
3826,00	94,77
3825,00	94,78
3824,00	94,78
3823,00	94,79
3822,00	94,80
3821,00	94,80
3820,00	94,79
3819,00	94,78
3818,00	94,79
3817,00	94,80
3816,00	94,81
3815,00	94,81
3814,00	94,80
3813,00	94,80
3812,00	94,79
3811,00	94,79
3810,00	94,78
3809,00	94,78
3808,00	94,79
3807,00	94,79
3806,00	94,79
3805,00	94,79
3804,00	94,80
3803,00	94,81
3802,00	94,82
3801,00	94,82
3800,00	94,82
3799,00	94,82
3798,00	94,83
3797,00	94,83
3796,00	94,82
3795,00	94,80
3794,00	94,79
3793,00	94,78
3792,00	94,78
3791,00	94,78
3790,00	94,78
3789,00	94,78
3788,00	94,77
3787,00	94,77
3786,00	94,78
3785,00	94,78
3784,00	94,79
3783,00	94,79
3782,00	94,78
3781,00	94,78
3780,00	94,77
3779,00	94,77
3778,00	94,78
3777,00	94,78
3776,00	94,79
3775,00	94,79
3774,00	94,80
3773,00	94,79
3772,00	94,79
3771,00	94,79
3770,00	94,78
3769,00	94,78
3768,00	94,78
3767,00	94,79
3766,00	94,80
3765,00	94,79
3764,00	94,79
3763,00	94,78
3762,00	94,78
3761,00	94,79
3760,00	94,80
3759,00	94,81
3758,00	94,81
3757,00	94,81
3756,00	94,80
3755,00	94,79
3754,00	94,78
3753,00	94,78
3752,00	94,78
3751,00	94,78
3750,00	94,79
3749,00	94,79
3748,00	94,79
3747,00	94,81
3746,00	94,82
3745,00	94,82
3744,00	94,81
3743,00	94,79
3742,00	94,79
3741,00	94,80
3740,00	94,81
3739,00	94,81
3738,00	94,82
3737,00	94,83
3736,00	94,84
3735,00	94,86
3734,00	94,88
3733,00	94,89
3732,00	94,88
3731,00	94,87
3730,00	94,84
3729,00	94,82
3728,00	94,81
3727,00	94,81
3726,00	94,81
3725,00	94,82
3724,00	94,84
3723,00	94,86
3722,00	94,87
3721,00	94,88
3720,00	94,87
3719,00	94,86
3718,00	94,85
3717,00	94,83
3716,00	94,81
3715,00	94,80
3714,00	94,80
3713,00	94,79
3712,00	94,78
3711,00	94,77
3710,00	94,77
3709,00	94,78
3708,00	94,79
3707,00	94,79
3706,00	94,80
3705,00	94,79
3704,00	94,79
3703,00	94,77
3702,00	94,74
3701,00	94,72
3700,00	94,69
3699,00	94,67
3698,00	94,67
3697,00	94,67
3696,00	94,67
3695,00	94,67
3694,00	94,66
3693,00	94,65
3692,00	94,65
3691,00	94,66
3690,00	94,67
3689,00	94,68
3688,00	94,69
3687,00	94,68
3686,00	94,67
3685,00	94,67
3684,00	94,67
3683,00	94,67
3682,00	94,67
3681,00	94,67
3680,00	94,67
3679,00	94,67
3678,00	94,67
3677,00	94,67
3676,00	94,67
3675,00	94,67
3674,00	94,67
3673,00	94,67
3672,00	94,67
3671,00	94,67
3670,00	94,67
3669,00	94,66
3668,00	94,66
3667,00	94,66
3666,00	94,66
3665,00	94,67
3664,00	94,68
3663,00	94,68
3662,00	94,68
3661,00	94,69
3660,00	94,69
3659,00	94,69
3658,00	94,69
3657,00	94,69
3656,00	94,68
3655,00	94,66
3654,00	94,65
3653,00	94,64
3652,00	94,63
3651,00	94,62
3650,00	94,63
3649,00	94,64
3648,00	94,66
3647,00	94,66
3646,00	94,65
3645,00	94,64
3644,00	94,63
3643,00	94,62
3642,00	94,60
3641,00	94,59
3640,00	94,59
3639,00	94,59
3638,00	94,59
3637,00	94,58
3636,00	94,57
3635,00	94,55
3634,00	94,53
3633,00	94,51
3632,00	94,51
3631,00	94,51
3630,00	94,51
3629,00	94,51
3628,00	94,50
3627,00	94,49
3626,00	94,48
3625,00	94,47
3624,00	94,47
3623,00	94,46
3622,00	94,45
3621,00	94,45
3620,00	94,45
3619,00	94,46
3618,00	94,46
3617,00	94,46
3616,00	94,46
3615,00	94,46
3614,00	94,47
3613,00	94,47
3612,00	94,47
3611,00	94,47
3610,00	94,46
3609,00	94,46
3608,00	94,47
3607,00	94,47
3606,00	94,48
3605,00	94,48
3604,00	94,47
3603,00	94,47
3602,00	94,47
3601,00	94,47
3600,00	94,48
3599,00	94,47
3598,00	94,47
3597,00	94,45
3596,00	94,44
3595,00	94,43
3594,00	94,43
3593,00	94,43
3592,00	94,43
3591,00	94,42
3590,00	94,42
3589,00	94,42
3588,00	94,42
3587,00	94,43
3586,00	94,43
3585,00	94,43
3584,00	94,42
3583,00	94,42
3582,00	94,40
3581,00	94,39
3580,00	94,38
3579,00	94,37
3578,00	94,36
3577,00	94,36
3576,00	94,35
3575,00	94,34
3574,00	94,33
3573,00	94,31
3572,00	94,30
3571,00	94,28
3570,00	94,27
3569,00	94,26
3568,00	94,26
3567,00	94,26
3566,00	94,26
3565,00	94,25
3564,00	94,23
3563,00	94,22
3562,00	94,21
3561,00	94,20
3560,00	94,19
3559,00	94,18
3558,00	94,17
3557,00	94,16
3556,00	94,15
3555,00	94,14
3554,00	94,13
3553,00	94,13
3552,00	94,12
3551,00	94,11
3550,00	94,10
3549,00	94,09
3548,00	94,09
3547,00	94,08
3546,00	94,08
3545,00	94,08
3544,00	94,08
3543,00	94,06
3542,00	94,05
3541,00	94,03
3540,00	94,01
3539,00	93,99
3538,00	93,98
3537,00	93,97
3536,00	93,96
3535,00	93,95
3534,00	93,94
3533,00	93,93
3532,00	93,91
3531,00	93,90
3530,00	93,89
3529,00	93,88
3528,00	93,87
3527,00	93,86
3526,00	93,85
3525,00	93,85
3524,00	93,84
3523,00	93,84
3522,00	93,84
3521,00	93,83
3520,00	93,83
3519,00	93,83
3518,00	93,82
3517,00	93,81
3516,00	93,79
3515,00	93,78
3514,00	93,77
3513,00	93,76
3512,00	93,76
3511,00	93,76
3510,00	93,76
3509,00	93,75
3508,00	93,74
3507,00	93,73
3506,00	93,73
3505,00	93,72
3504,00	93,72
3503,00	93,72
3502,00	93,70
3501,00	93,70
3500,00	93,69
3499,00	93,69
3498,00	93,69
3497,00	93,68
3496,00	93,68
3495,00	93,67
3494,00	93,67
3493,00	93,66
3492,00	93,66
3491,00	93,66
3490,00	93,65
3489,00	93,64
3488,00	93,63
3487,00	93,62
3486,00	93,62
3485,00	93,61
3484,00	93,61
3483,00	93,60
3482,00	93,60
3481,00	93,59
3480,00	93,58
3479,00	93,57
3478,00	93,57
3477,00	93,56
3476,00	93,55
3475,00	93,54
3474,00	93,53
3473,00	93,52
3472,00	93,52
3471,00	93,52
3470,00	93,52
3469,00	93,51
3468,00	93,50
3467,00	93,49
3466,00	93,48
3465,00	93,48
3464,00	93,48
3463,00	93,48
3462,00	93,48
3461,00	93,47
3460,00	93,47
3459,00	93,47
3458,00	93,47
3457,00	93,48
3456,00	93,47
3455,00	93,47
3454,00	93,46
3453,00	93,45
3452,00	93,44
3451,00	93,44
3450,00	93,44
3449,00	93,43
3448,00	93,43
3447,00	93,42
3446,00	93,42
3445,00	93,41
3444,00	93,41
3443,00	93,41
3442,00	93,41
3441,00	93,40
3440,00	93,40
3439,00	93,39
3438,00	93,39
3437,00	93,39
3436,00	93,39
3435,00	93,39
3434,00	93,38
3433,00	93,37
3432,00	93,36
3431,00	93,35
3430,00	93,35
3429,00	93,34
3428,00	93,34
3427,00	93,34
3426,00	93,34
3425,00	93,34
3424,00	93,34
3423,00	93,34
3422,00	93,34
3421,00	93,34
3420,00	93,33
3419,00	93,33
3418,00	93,32
3417,00	93,33
3416,00	93,33
3415,00	93,33
3414,00	93,33
3413,00	93,32
3412,00	93,31
3411,00	93,31
3410,00	93,31
3409,00	93,31
3408,00	93,32
3407,00	93,33
3406,00	93,33
3405,00	93,33
3404,00	93,32
3403,00	93,33
3402,00	93,33
3401,00	93,33
3400,00	93,32
3399,00	93,32
3398,00	93,31
3397,00	93,31
3396,00	93,31
3395,00	93,32
3394,00	93,33
3393,00	93,34
3392,00	93,34
3391,00	93,34
3390,00	93,33
3389,00	93,33
3388,00	93,33
3387,00	93,33
3386,00	93,33
3385,00	93,33
3384,00	93,32
3383,00	93,32
3382,00	93,31
3381,00	93,31
3380,00	93,32
3379,00	93,32
3378,00	93,33
3377,00	93,33
3376,00	93,33
3375,00	93,33
3374,00	93,34
3373,00	93,34
3372,00	93,35
3371,00	93,35
3370,00	93,35
3369,00	93,35
3368,00	93,36
3367,00	93,37
3366,00	93,37
3365,00	93,37
3364,00	93,37
3363,00	93,37
3362,00	93,36
3361,00	93,37
3360,00	93,37
3359,00	93,38
3358,00	93,38
3357,00	93,38
3356,00	93,38
3355,00	93,38
3354,00	93,39
3353,00	93,39
3352,00	93,40
3351,00	93,40
3350,00	93,40
3349,00	93,40
3348,00	93,40
3347,00	93,40
3346,00	93,41
3345,00	93,41
3344,00	93,41
3343,00	93,42
3342,00	93,42
3341,00	93,43
3340,00	93,44
3339,00	93,44
3338,00	93,44
3337,00	93,43
3336,00	93,43
3335,00	93,43
3334,00	93,44
3333,00	93,44
3332,00	93,45
3331,00	93,45
3330,00	93,46
3329,00	93,47
3328,00	93,47
3327,00	93,48
3326,00	93,49
3325,00	93,49
3324,00	93,50
3323,00	93,50
3322,00	93,50
3321,00	93,50
3320,00	93,50
3319,00	93,50
3318,00	93,50
3317,00	93,50
3316,00	93,51
3315,00	93,52
3314,00	93,53
3313,00	93,53
3312,00	93,53
3311,00	93,53
3310,00	93,53
3309,00	93,53
3308,00	93,54
3307,00	93,54
3306,00	93,54
3305,00	93,55
3304,00	93,55
3303,00	93,56
3302,00	93,57
3301,00	93,58
3300,00	93,58
3299,00	93,58
3298,00	93,58
3297,00	93,58
3296,00	93,59
3295,00	93,59
3294,00	93,59
3293,00	93,59
3292,00	93,60
3291,00	93,60
3290,00	93,59
3289,00	93,59
3288,00	93,59
3287,00	93,60
3286,00	93,61
3285,00	93,62
3284,00	93,63
3283,00	93,64
3282,00	93,64
3281,00	93,63
3280,00	93,63
3279,00	93,63
3278,00	93,63
3277,00	93,63
3276,00	93,64
3275,00	93,64
3274,00	93,65
3273,00	93,65
3272,00	93,66
3271,00	93,67
3270,00	93,66
3269,00	93,66
3268,00	93,66
3267,00	93,66
3266,00	93,67
3265,00	93,68
3264,00	93,68
3263,00	93,69
3262,00	93,69
3261,00	93,69
3260,00	93,69
3259,00	93,69
3258,00	93,70
3257,00	93,71
3256,00	93,72
3255,00	93,72
3254,00	93,72
3253,00	93,73
3252,00	93,73
3251,00	93,73
3250,00	93,74
3249,00	93,74
3248,00	93,74
3247,00	93,75
3246,00	93,75
3245,00	93,75
3244,00	93,75
3243,00	93,75
3242,00	93,76
3241,00	93,77
3240,00	93,78
3239,00	93,79
3238,00	93,79
3237,00	93,79
3236,00	93,79
3235,00	93,78
3234,00	93,79
3233,00	93,79
3232,00	93,79
3231,00	93,79
3230,00	93,79
3229,00	93,80
3228,00	93,80
3227,00	93,80
3226,00	93,80
3225,00	93,81
3224,00	93,81
3223,00	93,81
3222,00	93,81
3221,00	93,82
3220,00	93,82
3219,00	93,82
3218,00	93,82
3217,00	93,83
3216,00	93,84
3215,00	93,85
3214,00	93,85
3213,00	93,85
3212,00	93,85
3211,00	93,84
3210,00	93,84
3209,00	93,84
3208,00	93,84
3207,00	93,84
3206,00	93,85
3205,00	93,85
3204,00	93,86
3203,00	93,86
3202,00	93,87
3201,00	93,87
3200,00	93,88
3199,00	93,88
3198,00	93,88
3197,00	93,87
3196,00	93,87
3195,00	93,87
3194,00	93,89
3193,00	93,90
3192,00	93,91
3191,00	93,91
3190,00	93,91
3189,00	93,91
3188,00	93,91
3187,00	93,92
3186,00	93,92
3185,00	93,92
3184,00	93,93
3183,00	93,93
3182,00	93,94
3181,00	93,94
3180,00	93,95
3179,00	93,95
3178,00	93,96
3177,00	93,96
3176,00	93,97
3175,00	93,97
3174,00	93,96
3173,00	93,96
3172,00	93,96
3171,00	93,96
3170,00	93,97
3169,00	93,97
3168,00	93,98
3167,00	93,98
3166,00	93,98
3165,00	93,98
3164,00	93,98
3163,00	93,99
3162,00	94,00
3161,00	94,01
3160,00	94,02
3159,00	94,02
3158,00	94,02
3157,00	94,02
3156,00	94,03
3155,00	94,03
3154,00	94,04
3153,00	94,04
3152,00	94,05
3151,00	94,05
3150,00	94,06
3149,00	94,06
3148,00	94,06
3147,00	94,06
3146,00	94,06
3145,00	94,06
3144,00	94,06
3143,00	94,07
3142,00	94,07
3141,00	94,08
3140,00	94,08
3139,00	94,09
3138,00	94,09
3137,00	94,09
3136,00	94,10
3135,00	94,11
3134,00	94,11
3133,00	94,12
3132,00	94,12
3131,00	94,13
3130,00	94,13
3129,00	94,13
3128,00	94,14
3127,00	94,15
3126,00	94,15
3125,00	94,16
3124,00	94,16
3123,00	94,16
3122,00	94,17
3121,00	94,18
3120,00	94,19
3119,00	94,19
3118,00	94,19
3117,00	94,18
3116,00	94,18
3115,00	94,18
3114,00	94,19
3113,00	94,20
3112,00	94,21
3111,00	94,21
3110,00	94,21
3109,00	94,20
3108,00	94,20
3107,00	94,20
3106,00	94,20
3105,00	94,21
3104,00	94,22
3103,00	94,23
3102,00	94,24
3101,00	94,25
3100,00	94,25
3099,00	94,25
3098,00	94,25
3097,00	94,24
3096,00	94,24
3095,00	94,25
3094,00	94,26
3093,00	94,27
3092,00	94,28
3091,00	94,28
3090,00	94,28
3089,00	94,28
3088,00	94,29
3087,00	94,29
3086,00	94,29
3085,00	94,28
3084,00	94,28
3083,00	94,27
3082,00	94,28
3081,00	94,29
3080,00	94,29
3079,00	94,30
3078,00	94,30
3077,00	94,30
3076,00	94,30
3075,00	94,30
3074,00	94,31
3073,00	94,31
3072,00	94,31
3071,00	94,31
3070,00	94,31
3069,00	94,31
3068,00	94,31
3067,00	94,31
3066,00	94,31
3065,00	94,32
3064,00	94,32
3063,00	94,32
3062,00	94,32
3061,00	94,33
3060,00	94,33
3059,00	94,34
3058,00	94,34
3057,00	94,34
3056,00	94,35
3055,00	94,36
3054,00	94,36
3053,00	94,36
3052,00	94,36
3051,00	94,36
3050,00	94,36
3049,00	94,36
3048,00	94,36
3047,00	94,35
3046,00	94,36
3045,00	94,36
3044,00	94,37
3043,00	94,37
3042,00	94,38
3041,00	94,38
3040,00	94,37
3039,00	94,36
3038,00	94,36
3037,00	94,36
3036,00	94,36
3035,00	94,36
3034,00	94,36
3033,00	94,36
3032,00	94,35
3031,00	94,35
3030,00	94,34
3029,00	94,34
3028,00	94,33
3027,00	94,32
3026,00	94,32
3025,00	94,32
3024,00	94,31
3023,00	94,31
3022,00	94,31
3021,00	94,30
3020,00	94,29
3019,00	94,27
3018,00	94,25
3017,00	94,23
3016,00	94,22
3015,00	94,20
3014,00	94,18
3013,00	94,15
3012,00	94,13
3011,00	94,10
3010,00	94,06
3009,00	94,03
3008,00	93,99
3007,00	93,96
3006,00	93,92
3005,00	93,87
3004,00	93,81
3003,00	93,74
3002,00	93,68
3001,00	93,62
3000,00	93,56
2999,00	93,49
2998,00	93,43
2997,00	93,36
2996,00	93,28
2995,00	93,21
2994,00	93,14
2993,00	93,07
2992,00	92,99
2991,00	92,90
2990,00	92,82
2989,00	92,72
2988,00	92,63
2987,00	92,54
2986,00	92,44
2985,00	92,33
2984,00	92,22
2983,00	92,11
2982,00	91,99
2981,00	91,87
2980,00	91,74
2979,00	91,61
2978,00	91,47
2977,00	91,32
2976,00	91,16
2975,00	91,00
2974,00	90,84
2973,00	90,68
2972,00	90,51
2971,00	90,33
2970,00	90,15
2969,00	89,97
2968,00	89,80
2967,00	89,63
2966,00	89,47
2965,00	89,31
2964,00	89,16
2963,00	89,02
2962,00	88,89
2961,00	88,77
2960,00	88,65
2959,00	88,54
2958,00	88,43
2957,00	88,32
2956,00	88,22
2955,00	88,11
2954,00	88,00
2953,00	87,89
2952,00	87,78
2951,00	87,66
2950,00	87,54
2949,00	87,42
2948,00	87,29
2947,00	87,17
2946,00	87,04
2945,00	86,92
2944,00	86,79
2943,00	86,67
2942,00	86,54
2941,00	86,41
2940,00	86,27
2939,00	86,14
2938,00	86,01
2937,00	85,88
2936,00	85,75
2935,00	85,62
2934,00	85,50
2933,00	85,39
2932,00	85,27
2931,00	85,17
2930,00	85,07
2929,00	84,99
2928,00	84,91
2927,00	84,86
2926,00	84,82
2925,00	84,80
2924,00	84,79
2923,00	84,79
2922,00	84,80
2921,00	84,83
2920,00	84,86
2919,00	84,91
2918,00	84,96
2917,00	85,01
2916,00	85,07
2915,00	85,13
2914,00	85,19
2913,00	85,26
2912,00	85,34
2911,00	85,41
2910,00	85,49
2909,00	85,57
2908,00	85,64
2907,00	85,72
2906,00	85,79
2905,00	85,87
2904,00	85,95
2903,00	86,04
2902,00	86,13
2901,00	86,21
2900,00	86,30
2899,00	86,38
2898,00	86,46
2897,00	86,54
2896,00	86,62
2895,00	86,69
2894,00	86,76
2893,00	86,82
2892,00	86,88
2891,00	86,94
2890,00	87,00
2889,00	87,06
2888,00	87,11
2887,00	87,17
2886,00	87,21
2885,00	87,25
2884,00	87,28
2883,00	87,31
2882,00	87,33
2881,00	87,34
2880,00	87,34
2879,00	87,32
2878,00	87,29
2877,00	87,24
2876,00	87,18
2875,00	87,11
2874,00	87,03
2873,00	86,95
2872,00	86,86
2871,00	86,79
2870,00	86,72
2869,00	86,67
2868,00	86,64
2867,00	86,63
2866,00	86,64
2865,00	86,65
2864,00	86,68
2863,00	86,70
2862,00	86,74
2861,00	86,78
2860,00	86,82
2859,00	86,86
2858,00	86,89
2857,00	86,91
2856,00	86,92
2855,00	86,92
2854,00	86,91
2853,00	86,91
2852,00	86,92
2851,00	86,92
2850,00	86,93
2849,00	86,96
2848,00	86,99
2847,00	87,05
2846,00	87,12
2845,00	87,21
2844,00	87,32
2843,00	87,44
2842,00	87,58
2841,00	87,73
2840,00	87,89
2839,00	88,06
2838,00	88,23
2837,00	88,39
2836,00	88,55
2835,00	88,69
2834,00	88,82
2833,00	88,95
2832,00	89,07
2831,00	89,19
2830,00	89,30
2829,00	89,41
2828,00	89,51
2827,00	89,62
2826,00	89,72
2825,00	89,83
2824,00	89,95
2823,00	90,08
2822,00	90,21
2821,00	90,35
2820,00	90,49
2819,00	90,62
2818,00	90,74
2817,00	90,86
2816,00	90,97
2815,00	91,07
2814,00	91,16
2813,00	91,26
2812,00	91,34
2811,00	91,42
2810,00	91,50
2809,00	91,58
2808,00	91,65
2807,00	91,71
2806,00	91,76
2805,00	91,81
2804,00	91,86
2803,00	91,91
2802,00	91,96
2801,00	92,00
2800,00	92,04
2799,00	92,08
2798,00	92,11
2797,00	92,14
2796,00	92,18
2795,00	92,21
2794,00	92,24
2793,00	92,28
2792,00	92,31
2791,00	92,33
2790,00	92,35
2789,00	92,37
2788,00	92,39
2787,00	92,41
2786,00	92,43
2785,00	92,45
2784,00	92,47
2783,00	92,49
2782,00	92,51
2781,00	92,53
2780,00	92,55
2779,00	92,57
2778,00	92,59
2777,00	92,61
2776,00	92,62
2775,00	92,64
2774,00	92,65
2773,00	92,67
2772,00	92,68
2771,00	92,70
2770,00	92,72
2769,00	92,73
2768,00	92,75
2767,00	92,77
2766,00	92,78
2765,00	92,79
2764,00	92,79
2763,00	92,80
2762,00	92,81
2761,00	92,82
2760,00	92,83
2759,00	92,85
2758,00	92,87
2757,00	92,88
2756,00	92,89
2755,00	92,90
2754,00	92,90
2753,00	92,91
2752,00	92,91
2751,00	92,91
2750,00	92,92
2749,00	92,92
2748,00	92,93
2747,00	92,94
2746,00	92,95
2745,00	92,96
2744,00	92,96
2743,00	92,97
2742,00	92,97
2741,00	92,96
2740,00	92,97
2739,00	92,97
2738,00	92,97
2737,00	92,97
2736,00	92,98
2735,00	92,98
2734,00	92,98
2733,00	92,98
2732,00	92,98
2731,00	92,98
2730,00	92,98
2729,00	92,98
2728,00	92,98
2727,00	92,98
2726,00	92,98
2725,00	92,99
2724,00	93,00
2723,00	93,01
2722,00	93,01
2721,00	93,02
2720,00	93,02
2719,00	93,03
2718,00	93,04
2717,00	93,05
2716,00	93,06
2715,00	93,06
2714,00	93,06
2713,00	93,06
2712,00	93,07
2711,00	93,08
2710,00	93,09
2709,00	93,09
2708,00	93,09
2707,00	93,09
2706,00	93,10
2705,00	93,11
2704,00	93,12
2703,00	93,13
2702,00	93,14
2701,00	93,15
2700,00	93,16
2699,00	93,17
2698,00	93,17
2697,00	93,17
2696,00	93,17
2695,00	93,17
2694,00	93,16
2693,00	93,16
2692,00	93,16
2691,00	93,16
2690,00	93,17
2689,00	93,17
2688,00	93,16
2687,00	93,16
2686,00	93,16
2685,00	93,16
2684,00	93,16
2683,00	93,17
2682,00	93,17
2681,00	93,17
2680,00	93,18
2679,00	93,18
2678,00	93,19
2677,00	93,19
2676,00	93,19
2675,00	93,18
2674,00	93,17
2673,00	93,17
2672,00	93,17
2671,00	93,17
2670,00	93,17
2669,00	93,17
2668,00	93,17
2667,00	93,17
2666,00	93,17
2665,00	93,17
2664,00	93,17
2663,00	93,16
2662,00	93,16
2661,00	93,16
2660,00	93,16
2659,00	93,16
2658,00	93,16
2657,00	93,16
2656,00	93,16
2655,00	93,17
2654,00	93,17
2653,00	93,18
2652,00	93,18
2651,00	93,19
2650,00	93,19
2649,00	93,20
2648,00	93,21
2647,00	93,22
2646,00	93,23
2645,00	93,24
2644,00	93,25
2643,00	93,25
2642,00	93,26
2641,00	93,26
2640,00	93,27
2639,00	93,27
2638,00	93,27
2637,00	93,28
2636,00	93,28
2635,00	93,28
2634,00	93,28
2633,00	93,29
2632,00	93,30
2631,00	93,31
2630,00	93,31
2629,00	93,32
2628,00	93,32
2627,00	93,33
2626,00	93,34
2625,00	93,34
2624,00	93,34
2623,00	93,35
2622,00	93,35
2621,00	93,35
2620,00	93,36
2619,00	93,37
2618,00	93,38
2617,00	93,40
2616,00	93,40
2615,00	93,41
2614,00	93,41
2613,00	93,41
2612,00	93,41
2611,00	93,41
2610,00	93,41
2609,00	93,42
2608,00	93,43
2607,00	93,44
2606,00	93,45
2605,00	93,46
2604,00	93,46
2603,00	93,46
2602,00	93,46
2601,00	93,46
2600,00	93,46
2599,00	93,46
2598,00	93,47
2597,00	93,48
2596,00	93,49
2595,00	93,50
2594,00	93,51
2593,00	93,52
2592,00	93,53
2591,00	93,53
2590,00	93,53
2589,00	93,53
2588,00	93,54
2587,00	93,54
2586,00	93,55
2585,00	93,56
2584,00	93,56
2583,00	93,56
2582,00	93,57
2581,00	93,57
2580,00	93,58
2579,00	93,58
2578,00	93,58
2577,00	93,58
2576,00	93,58
2575,00	93,59
2574,00	93,59
2573,00	93,60
2572,00	93,60
2571,00	93,61
2570,00	93,61
2569,00	93,61
2568,00	93,60
2567,00	93,61
2566,00	93,62
2565,00	93,63
2564,00	93,63
2563,00	93,64
2562,00	93,64
2561,00	93,64
2560,00	93,65
2559,00	93,65
2558,00	93,65
2557,00	93,65
2556,00	93,66
2555,00	93,67
2554,00	93,67
2553,00	93,67
2552,00	93,68
2551,00	93,69
2550,00	93,70
2549,00	93,71
2548,00	93,71
2547,00	93,72
2546,00	93,72
2545,00	93,73
2544,00	93,73
2543,00	93,73
2542,00	93,73
2541,00	93,72
2540,00	93,72
2539,00	93,73
2538,00	93,72
2537,00	93,72
2536,00	93,72
2535,00	93,73
2534,00	93,74
2533,00	93,75
2532,00	93,74
2531,00	93,74
2530,00	93,73
2529,00	93,73
2528,00	93,74
2527,00	93,75
2526,00	93,75
2525,00	93,75
2524,00	93,76
2523,00	93,76
2522,00	93,77
2521,00	93,77
2520,00	93,77
2519,00	93,77
2518,00	93,77
2517,00	93,77
2516,00	93,77
2515,00	93,76
2514,00	93,77
2513,00	93,78
2512,00	93,81
2511,00	93,83
2510,00	93,86
2509,00	93,87
2508,00	93,87
2507,00	93,86
2506,00	93,84
2505,00	93,82
2504,00	93,81
2503,00	93,80
2502,00	93,81
2501,00	93,82
2500,00	93,84
2499,00	93,85
2498,00	93,86
2497,00	93,87
2496,00	93,87
2495,00	93,87
2494,00	93,86
2493,00	93,85
2492,00	93,85
2491,00	93,84
2490,00	93,85
2489,00	93,87
2488,00	93,88
2487,00	93,88
2486,00	93,89
2485,00	93,89
2484,00	93,90
2483,00	93,91
2482,00	93,92
2481,00	93,92
2480,00	93,92
2479,00	93,91
2478,00	93,91
2477,00	93,91
2476,00	93,91
2475,00	93,91
2474,00	93,92
2473,00	93,92
2472,00	93,92
2471,00	93,93
2470,00	93,93
2469,00	93,93
2468,00	93,93
2467,00	93,92
2466,00	93,92
2465,00	93,91
2464,00	93,90
2463,00	93,90
2462,00	93,89
2461,00	93,89
2460,00	93,89
2459,00	93,89
2458,00	93,89
2457,00	93,90
2456,00	93,90
2455,00	93,90
2454,00	93,90
2453,00	93,91
2452,00	93,91
2451,00	93,91
2450,00	93,92
2449,00	93,92
2448,00	93,93
2447,00	93,93
2446,00	93,94
2445,00	93,95
2444,00	93,95
2443,00	93,96
2442,00	93,97
2441,00	93,97
2440,00	93,96
2439,00	93,97
2438,00	93,97
2437,00	93,98
2436,00	93,97
2435,00	93,97
2434,00	93,98
2433,00	94,00
2432,00	94,02
2431,00	94,03
2430,00	94,02
2429,00	94,01
2428,00	94,00
2427,00	93,99
2426,00	93,99
2425,00	93,99
2424,00	94,01
2423,00	94,03
2422,00	94,04
2421,00	94,04
2420,00	94,04
2419,00	94,04
2418,00	94,04
2417,00	94,04
2416,00	94,03
2415,00	94,03
2414,00	94,03
2413,00	94,03
2412,00	94,03
2411,00	94,02
2410,00	94,02
2409,00	94,03
2408,00	94,04
2407,00	94,05
2406,00	94,06
2405,00	94,07
2404,00	94,07
2403,00	94,07
2402,00	94,08
2401,00	94,08
2400,00	94,09
2399,00	94,09
2398,00	94,09
2397,00	94,08
2396,00	94,06
2395,00	94,05
2394,00	94,05
2393,00	94,05
2392,00	94,06
2391,00	94,07
2390,00	94,08
2389,00	94,08
2388,00	94,08
2387,00	94,07
2386,00	94,06
2385,00	94,06
2384,00	94,07
2383,00	94,09
2382,00	94,11
2381,00	94,12
2380,00	94,14
2379,00	94,16
2378,00	94,18
2377,00	94,20
2376,00	94,20
2375,00	94,20
2374,00	94,20
2373,00	94,19
2372,00	94,18
2371,00	94,17
2370,00	94,17
2369,00	94,17
2368,00	94,19
2367,00	94,21
2366,00	94,22
2365,00	94,21
2364,00	94,19
2363,00	94,16
2362,00	94,14
2361,00	94,13
2360,00	94,13
2359,00	94,13
2358,00	94,14
2357,00	94,16
2356,00	94,20
2355,00	94,23
2354,00	94,26
2353,00	94,27
2352,00	94,26
2351,00	94,24
2350,00	94,20
2349,00	94,18
2348,00	94,16
2347,00	94,17
2346,00	94,17
2345,00	94,17
2344,00	94,16
2343,00	94,15
2342,00	94,15
2341,00	94,15
2340,00	94,15
2339,00	94,15
2338,00	94,14
2337,00	94,14
2336,00	94,14
2335,00	94,14
2334,00	94,14
2333,00	94,14
2332,00	94,14
2331,00	94,15
2330,00	94,15
2329,00	94,13
2328,00	94,09
2327,00	94,04
2326,00	93,98
2325,00	93,94
2324,00	93,93
2323,00	93,95
2322,00	94,01
2321,00	94,05
2320,00	94,08
2319,00	94,09
2318,00	94,09
2317,00	94,09
2316,00	94,09
2315,00	94,09
2314,00	94,10
2313,00	94,11
2312,00	94,10
2311,00	94,09
2310,00	94,08
2309,00	94,07
2308,00	94,06
2307,00	94,05
2306,00	94,05
2305,00	94,05
2304,00	94,06
2303,00	94,06
2302,00	94,06
2301,00	94,05
2300,00	94,05
2299,00	94,05
2298,00	94,05
2297,00	94,05
2296,00	94,05
2295,00	94,05
2294,00	94,05
2293,00	94,04
2292,00	94,03
2291,00	94,01
2290,00	93,99
2289,00	93,97
2288,00	93,95
2287,00	93,93
2286,00	93,92
2285,00	93,91
2284,00	93,92
2283,00	93,94
2282,00	93,96
2281,00	93,99
2280,00	94,02
2279,00	94,04
2278,00	94,05
2277,00	94,05
2276,00	94,04
2275,00	94,03
2274,00	94,04
2273,00	94,05
2272,00	94,07
2271,00	94,10
2270,00	94,13
2269,00	94,13
2268,00	94,12
2267,00	94,11
2266,00	94,10
2265,00	94,09
2264,00	94,08
2263,00	94,07
2262,00	94,08
2261,00	94,07
2260,00	94,06
2259,00	94,05
2258,00	94,07
2257,00	94,10
2256,00	94,13
2255,00	94,14
2254,00	94,14
2253,00	94,15
2252,00	94,17
2251,00	94,19
2250,00	94,21
2249,00	94,23
2248,00	94,23
2247,00	94,21
2246,00	94,19
2245,00	94,16
2244,00	94,14
2243,00	94,14
2242,00	94,14
2241,00	94,13
2240,00	94,12
2239,00	94,10
2238,00	94,08
2237,00	94,10
2236,00	94,14
2235,00	94,20
2234,00	94,24
2233,00	94,24
2232,00	94,22
2231,00	94,21
2230,00	94,21
2229,00	94,21
2228,00	94,21
2227,00	94,20
2226,00	94,17
2225,00	94,15
2224,00	94,15
2223,00	94,15
2222,00	94,15
2221,00	94,14
2220,00	94,14
2219,00	94,13
2218,00	94,13
2217,00	94,13
2216,00	94,13
2215,00	94,13
2214,00	94,12
2213,00	94,08
2212,00	94,06
2211,00	94,07
2210,00	94,13
2209,00	94,19
2208,00	94,21
2207,00	94,20
2206,00	94,18
2205,00	94,15
2204,00	94,15
2203,00	94,18
2202,00	94,22
2201,00	94,26
2200,00	94,26
2199,00	94,23
2198,00	94,17
2197,00	94,12
2196,00	94,10
2195,00	94,12
2194,00	94,15
2193,00	94,17
2192,00	94,18
2191,00	94,19
2190,00	94,20
2189,00	94,19
2188,00	94,16
2187,00	94,12
2186,00	94,08
2185,00	94,06
2184,00	94,07
2183,00	94,09
2182,00	94,09
2181,00	94,06
2180,00	94,06
2179,00	94,09
2178,00	94,14
2177,00	94,16
2176,00	94,16
2175,00	94,19
2174,00	94,23
2173,00	94,26
2172,00	94,23
2171,00	94,16
2170,00	94,09
2169,00	94,06
2168,00	94,08
2167,00	94,12
2166,00	94,16
2165,00	94,19
2164,00	94,22
2163,00	94,28
2162,00	94,38
2161,00	94,49
2160,00	94,62
2159,00	94,78
2158,00	94,92
2157,00	94,98
2156,00	94,96
2155,00	94,87
2154,00	94,74
2153,00	94,61
2152,00	94,52
2151,00	94,49
2150,00	94,51
2149,00	94,52
2148,00	94,50
2147,00	94,47
2146,00	94,45
2145,00	94,46
2144,00	94,48
2143,00	94,50
2142,00	94,52
2141,00	94,56
2140,00	94,61
2139,00	94,66
2138,00	94,70
2137,00	94,71
2136,00	94,70
2135,00	94,70
2134,00	94,69
2133,00	94,68
2132,00	94,67
2131,00	94,67
2130,00	94,66
2129,00	94,63
2128,00	94,59
2127,00	94,56
2126,00	94,54
2125,00	94,50
2124,00	94,45
2123,00	94,40
2122,00	94,38
2121,00	94,39
2120,00	94,42
2119,00	94,44
2118,00	94,45
2117,00	94,44
2116,00	94,42
2115,00	94,40
2114,00	94,38
2113,00	94,36
2112,00	94,35
2111,00	94,37
2110,00	94,41
2109,00	94,43
2108,00	94,43
2107,00	94,39
2106,00	94,34
2105,00	94,31
2104,00	94,29
2103,00	94,29
2102,00	94,29
2101,00	94,30
2100,00	94,30
2099,00	94,31
2098,00	94,33
2097,00	94,35
2096,00	94,38
2095,00	94,41
2094,00	94,44
2093,00	94,45
2092,00	94,45
2091,00	94,44
2090,00	94,42
2089,00	94,39
2088,00	94,38
2087,00	94,38
2086,00	94,38
2085,00	94,36
2084,00	94,32
2083,00	94,29
2082,00	94,28
2081,00	94,29
2080,00	94,32
2079,00	94,36
2078,00	94,38
2077,00	94,38
2076,00	94,38
2075,00	94,39
2074,00	94,39
2073,00	94,40
2072,00	94,39
2071,00	94,37
2070,00	94,33
2069,00	94,29
2068,00	94,26
2067,00	94,27
2066,00	94,29
2065,00	94,31
2064,00	94,33
2063,00	94,35
2062,00	94,35
2061,00	94,35
2060,00	94,35
2059,00	94,37
2058,00	94,39
2057,00	94,39
2056,00	94,36
2055,00	94,32
2054,00	94,30
2053,00	94,29
2052,00	94,27
2051,00	94,25
2050,00	94,23
2049,00	94,22
2048,00	94,21
2047,00	94,22
2046,00	94,23
2045,00	94,25
2044,00	94,27
2043,00	94,31
2042,00	94,36
2041,00	94,39
2040,00	94,38
2039,00	94,32
2038,00	94,25
2037,00	94,21
2036,00	94,22
2035,00	94,28
2034,00	94,34
2033,00	94,39
2032,00	94,45
2031,00	94,54
2030,00	94,65
2029,00	94,71
2028,00	94,72
2027,00	94,72
2026,00	94,73
2025,00	94,73
2024,00	94,70
2023,00	94,65
2022,00	94,54
2021,00	94,40
2020,00	94,29
2019,00	94,29
2018,00	94,39
2017,00	94,50
2016,00	94,55
2015,00	94,53
2014,00	94,48
2013,00	94,42
2012,00	94,35
2011,00	94,29
2010,00	94,28
2009,00	94,33
2008,00	94,46
2007,00	94,63
2006,00	94,75
2005,00	94,73
2004,00	94,59
2003,00	94,46
[truncated: 1,783 more rows]
