# Supplementary material for: Dinosaur bonebed amber from an original swamp forest soil
Source: eLife. 2021 Nov 30;10:e72477. doi: 10.7554/eLife.72477 (PMC8631943; doi:10.7554/eLife.72477)
Supplement: Supplementary file 1. — ARN-01 and ARN-02 were obtained from the lower root layer with kidney-shaped amber pieces, and ARN-03 and ARN-04 from the upper litter layer rich in aerial amber pieces, all of them within the level AR-1. See also Figure 5 and Figure 5—figure supplement 1. [file elife-72477-supp1.xlsx]

## Sheet: Hoja1
Palynomorphs		ARN-01		ARN-02		ARN-03		ARN-04
	Botanical affinity		(%)		(%)		(%)		(%)
Aquatic palynomorphs
Ovoidites sp.	Zygnematales	0	0.0	1	0.11	1	0.12	0	0.0
Chomotriletes minor (Kedves, 1961) Pocock, 1970	Zygnematales	7	0.41	2	0.22	8	0.96	60	3.87
Miospores
Spores
Appendicisporites cf. cristatus (Markova, 1961) Pocock, 1965	Monilophyta; Anemiaceae	1	0.05	2	0.22	1	0.12	0	0.0
Appendicisporites erdtmanii Pocock, 1964	Monilophyta; Anemiaceae	0	0.0	0	0.0	1	0.12	0	0.0
Appendicisporites fucosus Vavrdov, 1964	Monilophyta; Anemiaceae	1	0.05	0	0.0	0	0.0	0	0.0
Appendicisporites cf. matesovae (Bolkhovitina, 1961) Vavrdov, 1964	Monilophyta; Anemiaceae	2	0.11	7	0.77	1	0.12	13	0.84
Appendicisporites problematicus (Burger, 1966) Singh, 1971	Monilophyta; Anemiaceae	11	0.64	3	0.33	1	0.12	8	0.51
Appendicisporites tricornitatus Weyland and Greifeld, 1953	Monilophyta; Anemiaceae	2	0.11	0	0.0	2	0.24	1	0.06
Appendicisporites spp.	Monilophyta; Anemiaceae	68	3.97	32	3.56	19	2.29	34	2.19
Baculatisporites sp.	Monilophyta; Osmundaceae	0	0.0	1	0.11	1	0.12	0	0.0
Biretisporites potoniei Delcourt and Sprumont, 1955	Monilophyta; uncertain affinities	3	0.17	2	0.22	6	0.72	8	0.51
Ceratosporites sp.	Lycophyta; Selaginellaceae	0	0	1	0.11	0	0	0	0
Cibotiumspora jurienensis (Balme, 1957) Filatoff, 1975	Monilophyta; uncertain affinities	2	0.11	1	0.11	4	0.48	1	0.06
Cicatricosisporites hughesii Dettmann, 1963	Monilophyta; Anemiaceae	0	0.0	1	0.11	0	0.0	0	0.0
Cicatricosisporites purbeckensis Norris, 1969	Monilophyta; Anemiaceae	0	0.0	0	0.0	1	0.12	0	0.0
Cicatricosisporites venustus Deák, 1963	Monilophyta; Anemiaceae	3	0.17	2	0.22	2	0.24	2	0.13
Cicatricosisporites spp.	Monilophyta; Anemiaceae	19	1.34	34	3.78	21	2.53	43	2.77
Clavifera spp.	Monilophyta; Gleicheniaceae	8	0.46	0	0.0	1	0.12	1	0.06
Concavissimisporites verrucosus (Delcourt and Sprumont, 1955) Delcourt, Dettmann and Hughes, 1963	Monilophyta; Dicksoniaceae/Lygodiaceae	7	0.41	1	0.11	0	0.0	0	0.0
Concavissimisporites spp.	Monilophyta; Dicksoniaceae/Lygodiaceae	1	0.05	1	0.11	1	0.12	0	0.0
Cyathidites australis Couper, 1953	Monilophyta; Cyatheaceae/Dicksoniaceae	19	1.34	68	7.56	38	4.57	88	5.67
Cyathidites minor Couper, 1953	Monilophyta; Cyatheaceae/Dicksoniaceae	165	9.64	158	17.57	177	21.32	351	22.64
Densoisporites velatus Weyland and Krieger, 1953	Lycophyta; †Pleuromeiaceae?	0	0.0	1	0.11	1	0.12	0	0.0
Dictyophyllidites harrisii Couper, 1958	Monilophyta; Dipteridaceae/Matoniaceae	0	0.0	9	1.00	6	0.72	2	0.13
Echinatisporis varispinosus (Pocock, 1962) Srivastava, 1977	Lycophyta; Selaginellaceae	9	0.52	13	1.22	1	0.12	9	0.58
Foraminisporis cf. undulatus Leffingwell, 1971	Hepaticophyta	4	0.23	1	0.11	1	0.12	0	0.0
Granulatisporites cf. infirmus (Balme, 1957) Cornet and Traverse, 1975	Monilophyta; †Botryopteridales	6	0.35	1	0.11	1	0.12	6	0.38
Gleicheniidites senonicus Ross, 1949	Monilophyta; Gleicheniaceae	20	1.16	53	5.89	35	4.21	56	3.61
Ischyosporites spp.	Monilophyta; Schizaeaceae	8	0.46	3	0.33	4	0.48	6	0.38
Laevigatosporites haardti (Potonié and Venitz, 1934) Thomson and Pflug, 1953	Monilophyta; uncertain affinities	23	1.34	9	1.00	7	0.84	31	2.00
Leptolepidites spp.	Lycophyta; uncertain affinities	9	0.52	0	0.0	6	0.72	7	0.45
Neoraistrickia spp.	Lycophyta; Selaginellaceae	7	0.41	4	0.44	3	0.36	20	1.29
Osmundacidites spp.	Monilophyta; Osmundaceae	11	0.64	2	0.22	2	0.24	7	0.45
Plicifera sp.	Monilophyta; Gleicheniaceae	5	0.29	4	0.52	4	0.48	8	0.51
Retitriletes spp.	Lycophyta; Lycopodiaceae	1	0.05	0	0.0	0	0.0	0	0.0
Staplinisporites cf. telatus (Balme, 1957) Döring, 1965	Lycophyta; Lycopodiaceae	0	0.0	1	0.11	0	0.0	0	0.0
Stereisporites spp.	Bryophyta; Sphagnaceae	1	0.05	1	0.11	0	0.0	1	0.06
Striatella cf. balmei Filatoff and Price, 1988	Monilophyta; uncertain affinities	0	0.0	1	0.11	0	0.0	0	0.0
Trilobosporites purverulentus (Verbitskaya, 1962) Dettmann, 1963	Monilophyta; Lygodiaceae	0	0.0	14	1.55	0	0.0	0	0.0
Triporoletes reticulatus (Pocock, 1962) Playford, 1971	Hepaticophyta; cf. Ricciaceae	0	0.0	1	0.11	0	0.0	0	0.0
Undulatisporites spp.	Monilophyta; uncertain affinities	1	0.05	1	0.11	2	0.24	3	0.19
Undetermined trilete spores	Uncertain affinities	114	6.66	39	4.33	59	7.11	71	4.58
Pollen grains (gymnosperms)
Alisporites spp.	Uncertain affinities (†Corystospermales?, Podocarpaceae?)	6	0.35	1	0.11	3	0.36	4	0.26
Araucariacites australis Cookson, 1947	Coniferales; Araucariaceae	86	5.02	11	1.22	11	1.32	22	1.42
Araucariacites hungaricus Déak, 1964	Coniferales; Araucariaceae	133	7.77	19	2.11	2	0.24	4	0.26
Callialasporites segmentatus (Balme, 1957) Srivastava, 1963	Coniferales; Araucariaceae	1	0.05	0	0.0	0	0.0	0	0.0
Callialasporites trilobatus (Balme, 1957) Dev, 1961	Coniferales; Araucariaceae	0	0.0	5	0.55	7	0.84	9	0.58
Callialasporites spp.	Coniferales; Araucariaceae	9	0.52	5	0.55	3	0.36	5	0.39
Cerebropollenites macroverrucosus (Thiergart, 1949) Schulz, 1967	Uncertain affinities	1	0.05	1	0.11	2	0.24	0	0.0
Classopollis cf. major Groot and Groot, 1962	Coniferales; †Cheirolepidiaceae	116	6.78	57	6.34	35	4.21	88	5.67
Classopollis spp.	Coniferales; †Cheirolepidiaceae	157	9.17	76	8.45	43	5.18	122	7.87
Cycadopites spp.	Uncertain affinities (†Bennettitales, Cycadales, Ginkgoales)	10	0.58	2	0.22	5	0.60	3	0.19
Equisetosporites spp.	Gnetales; Ephedraceae	2	0.11	0	0.0	0	0.0	0	0.0
Eucommiidites troedsonii Erdtman, 1948	†Erdtmanithecales	38	2.22	17	1.89	12	1.44	11	0.71
Eucommiidites minor Groot and Penny, 1960	†Erdtmanithecales	11	0.64	11	1.22	4	0.48	2	0.13
Eucommiidites spp.	†Erdtmanithecales	35	2.04	44	4.89	13	1.67	32	2.06
Exesipollenites sp.	Uncertain affinities (†Bennettitales, taxodioids)	2	0.11	4	0.52	8	0.96	8	0.51
Inaperturopollenites dubius (Potonié and Venitz, 1932) Thomson and Pflug, 1953	Coniferales; Cupressaceae (taxodioids)	246	14.37	115	12.79	169	20.36	291	18.77
Monosulcites spp.	Uncertain affinities (†Bennettitales, Cycadales, Ginkgoales)	19	1.34	6	0.66	7	0.84	4	0.26
Parvisaccites sp.	Uncertain affinities (Podocarpaceae, †Voltziales)	3	0.17	0	0.0	1	0.12	0	0.0
Pinuspollenites sp.	Coniferales; Pinaceae	1	0.05	1	0.11	0	0.0	0	0.0
Phyllocladidites sp.	Coniferales; Podocarpaceae	6	0.35	1	0.11	1	0.12	0	0.0
Podocarpidites sp.	Coniferales; Podocarpaceae	0	0.0	0	0.0	1	0.12	0	0.0
Undetermined bisaccate pollen grains	Uncertain affinities	36	2.10	11	1.22	13	1.67	26	1.67
Vitreisporites pallidus (Reissinger, 1950) Nilsson, 1958	†Caytoniales	1	0.05	1	0.11	2	0.24	5	0.39
Pollen grains (angiosperms)
Clavatipollenites hughesii Couper, 1958	Chloranthaceae	0	0.0	0	0.0	2	0.24	1	0.06
Clavatipollenites spp.	Chloranthaceae	17	0.99	4	0.44	5	0.60	17	1.09
Jusinghipollis ticoensis Llorens and Pérez Loinaze, 2016	Uncertain affinities	0	0.0	0	0.0	1	0.12	0	0.0
"Liliacidites" minutus (Brenner, 1963) Walker and Walker, 1984	Laurales	206	12.05	32	3.56	53	6.38	49	3.16
Liliacidites spp.	Monocots	1	0.05	0	0.0	0	0.0	1	0.06
Retimonocolpites dividuus Pierce, 1961	Uncertain affinities	0	0.0	0	0.0	2	0.24	0	0.0
Retimonocolpites spp.	Uncertain affinities	12	0.70	0	0.0	5	0.60	2	0.13
Stellatopollis cf. baghornii Doyle in Doyle, Van Campo and Lugardon, 1975	Uncertain affinities	1	0.05	0	0.0	0	0.0	0	0.0
Stellatopollis spp.	Uncertain affinities	1	0.05	0	0.0	0	0.0	0	0.0
Transitoripollis spp.	Uncertain affinities	1	0.05	1	0.11	1	0.12	6	0.38
Tricolpites spp.	Eudicots	7	0.41	0	0.0	0	0.0	1	0.06
Tucanopollis sp.	Chloranthaceae/Ceratophyllum	1	0.05	0	0.0	1	0.12	0	0.0
Total		1711	100	899	100	830	100	1550	100
